# Supplementary material for: α-myosin heavy chain lactylation maintains sarcomeric structure and function and alleviates the development of heart failure
Source: PubMed Central journal article supplement (PMC10474270; doi:10.1038/s41422-023-00844-w), 2023-07-13
Supplement: 41422_2023_844_MOESM2_ESM.pdf [file 41422_2023_844_MOESM2_ESM.pdf]

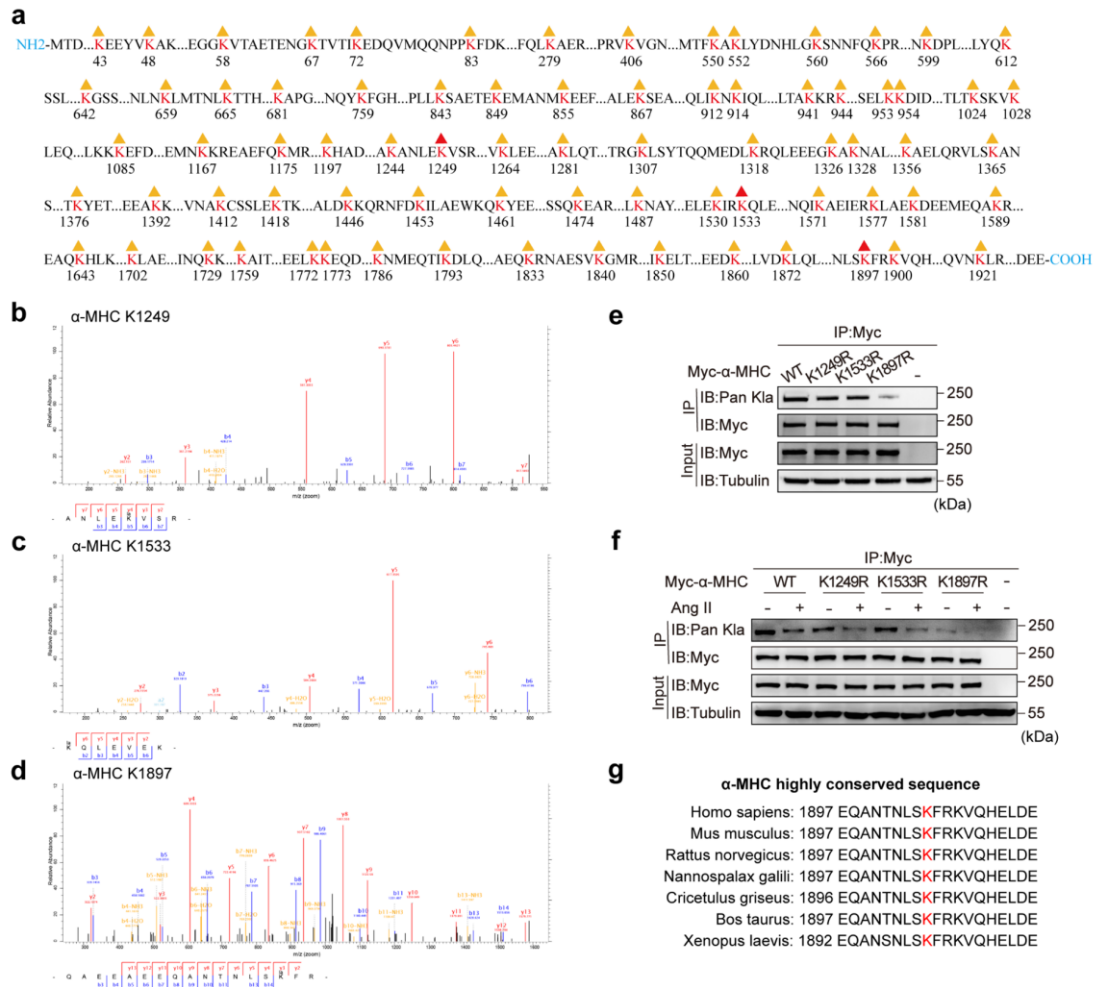

**Supplementary information, Fig. S2  $\alpha$ -MHC K1897 is the main lactylation sites of  $\alpha$ -MHC under physiological and Ang II treatment conditions.**

**a** Mass spectrometry revealed potential lactylation sites of  $\alpha$ -MHC. **b, c, d** Lactylation sites of  $\alpha$ -MHC identified by mass spectrometry: K1249 (**b**), K1533 (**c**) and K1897 (**d**). **e, f** Lactylation of K1897, K1533, and K1249 sites on the  $\alpha$ -MHC under physiological conditions and Ang II treatment conditions were determined by IP analysis. (**e**) HEK293T cells were transfected with plasmids expressing Myc- $\alpha$ -MHC WT, Myc- $\alpha$ -MHC K1249R, Myc- $\alpha$ -MHC K1533R and Myc- $\alpha$ -MHC K1897R. Equal amounts of lysates were prepared for IP with anti-Myc magnetic beads, followed by detection of Pan Kla. (**f**) HEK293T cells were transfected with plasmids expressing Myc- $\alpha$ -MHC WT, Myc- $\alpha$ -MHC K1249R, Myc- $\alpha$ -MHC K1533R and Myc- $\alpha$ -MHC K1897R without or with Ang II treatment. Equal amounts of lysates were prepared for IP with anti-Myc magnetic beads, followed by detection of Pan Kla. **g** Lactylated lysine residues were highlighted (red) in alignment of sequences surrounding K1897 in  $\alpha$ -MHC homologs from diverse species.
