# Supplementary material for: α-myosin heavy chain lactylation maintains sarcomeric structure and function and alleviates the development of heart failure
Source: PubMed Central journal article supplement (PMC10474270; doi:10.1038/s41422-023-00844-w), 2023-07-13
Supplement: 41422_2023_844_MOESM4_ESM.pdf [file 41422_2023_844_MOESM4_ESM.pdf]

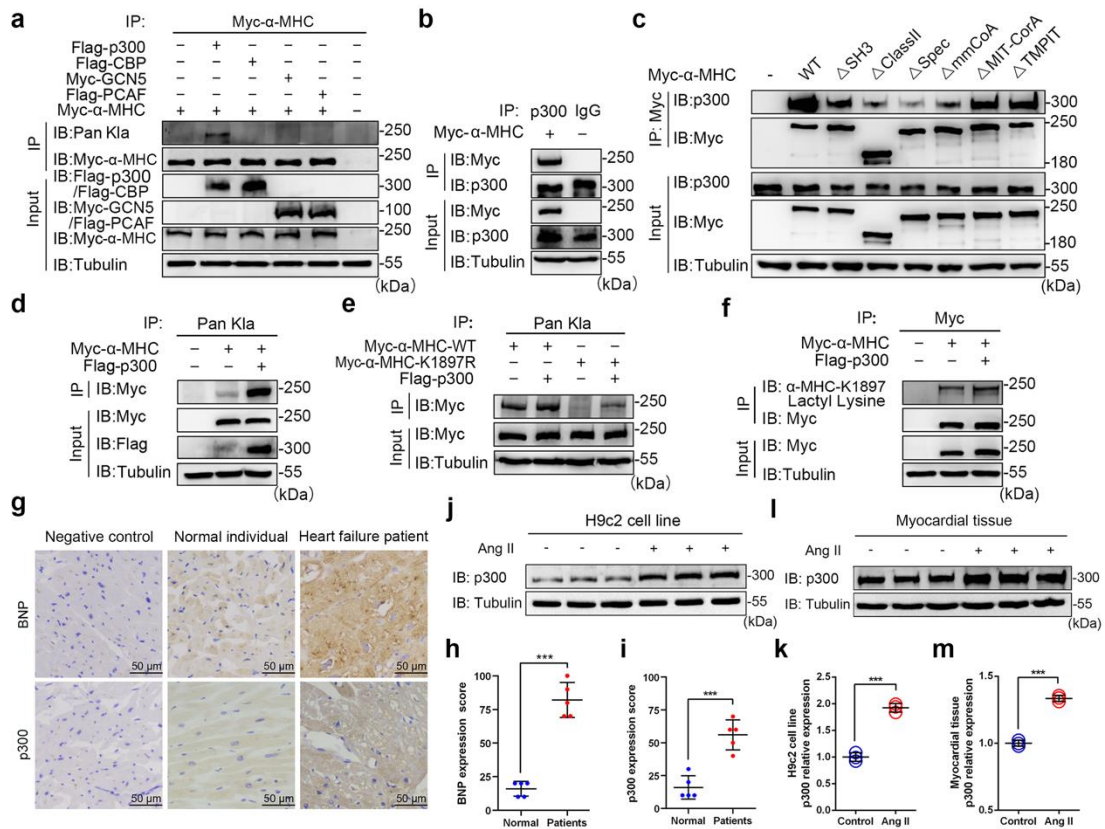

**Supplementary information, Fig. S4 p300 is the acyltransferase of  $\alpha$ -MHC K1897 lactylation.**

**a** Lactylation of  $\alpha$ -MHC was determined by IP analysis. HEK293T cells were transfected with plasmids expressing Myc- $\alpha$ -MHC, accompanied by overexpression of Flag-p300, Flag-CBP, Myc-GCN5 or Flag-PCAF. Equal amounts of lysates were prepared for IP with anti-Myc magnetic beads, followed by detection of Pan K1a. **b** HEK293T cells were transfected with Myc- $\alpha$ -MHC plasmid. Control IgG or anti-p300 antibody was used for IP followed by detection of Myc. **c**  $\alpha$ -MHC domains binding to p300 were determined by IP analysis. HEK293T cells were transfected with plasmids expressing Myc- $\alpha$ -MHC WT, Myc- $\alpha$ -MHC- $\Delta$ SH3, Myc- $\alpha$ -MHC- $\Delta$ ClassII, Myc- $\alpha$ -MHC- $\Delta$ Spec, Myc- $\alpha$ -MHC- $\Delta$ mmCoA, Myc- $\alpha$ -MHC- $\Delta$ MIT-CorA and Myc- $\alpha$ -MHC- $\Delta$ TMPIT (truncations). Equal amounts of lysates were prepared for IP with anti-Myc magnetic beads, followed by detection of p300. **d** IP analysis of lactylation of  $\alpha$ -MHC. HEK293T cells were transfected with the indicated plasmids (Flag-p300 and Myc- $\alpha$ -MHC). Equal amounts of lysates were prepared for IP with anti-Pan K1a antibody followed by detection of Myc. **e** IP analysis of lactylation of  $\alpha$ -MHC. HEK293T cells were transfected with the indicated plasmids (Myc- $\alpha$ -MHC WT, Myc- $\alpha$ -MHC K1897R and Flag-p300). Equal amounts of lysates were prepared for IP with anti-Pan K1a antibody, followed by detection of Myc. **f** IP analysis of  $\alpha$ -MHC K1897 lactylation. HEK293T cells were transfected with

indicated plasmids (Myc- $\alpha$ -MHC and Flag-p300) using anti-Myc magnetic beads, followed by detection of  $\alpha$ -MHC K1897 Lactyl Lysine. **g** Representative immunohistochemical (IHC) staining of BNP (top, using anti-BNP antibody) and p300 (bottom, using anti-p300 antibody) proteins in the heart tissues from normal controls and heart failure patients. Scale bars, 50 $\mu$ m. Negative controls were performed with normal rabbit IgG. **h, i** Quantification of the relative BNP and p300 expression score. (n=5 per group). **j** Western blot analysis to assess p300 expression levels in H9c2 cells with or without Ang II treatment. **k** Quantification of relative p300 expression in H9c2 cells. **l** Western blot analysis to assess p300 expression levels in myocardial tissues from mice after with or without Ang II treatment. **m** Quantification of relative p300 expression in myocardial tissues. (**a, c, f**) Anti-Myc magnetic beads were added in per immunoprecipitated sample. (**b**) Anti-p300 antibody or control IgG were added. (**d, e**) Anti-Pan K1a antibody was added. (**h, i, k, m**) Data are expressed as means  $\pm$  SD. Statistical significance was assessed by Student's *t*-test (\*\*\*)  $P < 0.001$ .
