# Supplementary material for: α-myosin heavy chain lactylation maintains sarcomeric structure and function and alleviates the development of heart failure
Source: PubMed Central journal article supplement (PMC10474270; doi:10.1038/s41422-023-00844-w), 2023-07-13
Supplement: 41422_2023_844_MOESM8_ESM.pdf [file 41422_2023_844_MOESM8_ESM.pdf]

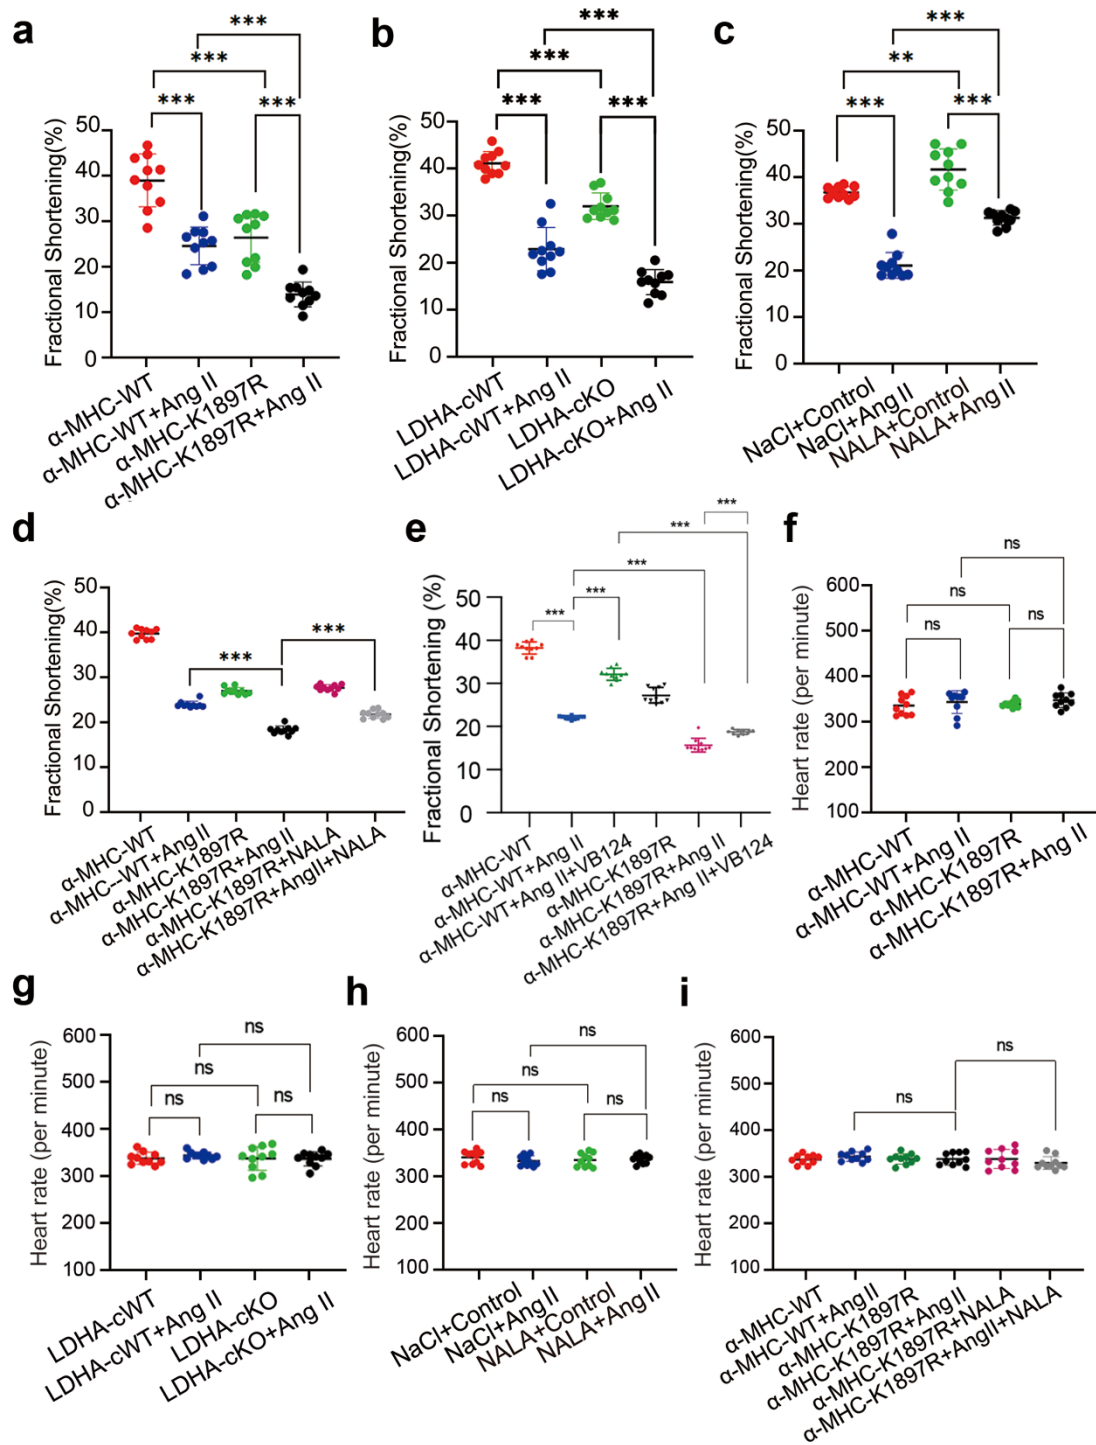

**Supplementary information, Fig. S8 Fractional shortening and heart rate of mice.**

**a, f** Cardiac function was evaluated by fractional shortening (FS%, **a**), and heart rate (**f**) of  $\alpha$ -MHC WT and  $\alpha$ -MHC K1897R mice after NaCl or Ang II treatment. **b, g** Cardiac function was evaluated by fractional shortening (FS%, **b**), and heart rate (**g**) of LDHA-cWT and LDHA-cKO mice after NaCl or Ang II treatment. **c, h** Cardiac function was evaluated by fractional shortening (FS%, **c**), and heart rate (**h**) of WT and Ang II groups with NaCl or NALA. **d, i** Cardiac function was evaluated

by fractional shortening (FS%, **d**), and heart rate (**i**) of  $\alpha$ -MHC WT mice (given control treatment or Ang II infusion) and  $\alpha$ -MHC K1897R mutant mice (given control treatment, Ang II infusion, NALA infusion or combined Ang II and NALA infusion). **e** Cardiac function was evaluated by fractional shortening (FS%) of  $\alpha$ -MHC WT mice and  $\alpha$ -MHC K1897R mutant mice (given control treatment, Ang II infusion, VB124 infusion or combined Ang II and VB124 infusion). (**a-i**) Data are expressed as means  $\pm$  SD. Statistical significance was assessed by 2-way ANOVA with Bonferroni multiple comparisons test (**a-c**, **f-h** P values adjusted for 6 comparisons, **d-e**, **i** P values adjusted for 10 comparisons; ns  $P > 0.05$  which means no significance; \*\*  $P < 0.01$ ; \*\*\*  $P < 0.001$ ).
