# Supplementary material for: α-myosin heavy chain lactylation maintains sarcomeric structure and function and alleviates the development of heart failure
Source: PubMed Central journal article supplement (PMC10474270; doi:10.1038/s41422-023-00844-w), 2023-07-13
Supplement: 41422_2023_844_MOESM9_ESM.pdf [file 41422_2023_844_MOESM9_ESM.pdf]

**Supplementary information, Table S1 The lactylation levels of all 142 overlapping lactated proteins between control group and Ang II-induced heart failure group (n = 3).**

| <b>Protein description</b> | <b>Control 1</b> | <b>Control 2</b> | <b>Control 3</b> | <b>Ang II 1</b> | <b>Ang II 2</b> | <b>Ang II 3</b> | <b>Fold change</b> | <b>P value</b> |
|----------------------------|------------------|------------------|------------------|-----------------|-----------------|-----------------|--------------------|----------------|
| Acaa2                      | 0.979            | 1.055            | 1.124            | 1.039           | 0.852           | 1.041           | 0.928              | 0.377          |
| Acad10                     | -                | 0.999            | -                | -               | 0.987           | -               | 0.988              | -              |
| Acad9                      | -                | -                | 1.047            | 0.963           | -               | -               | 0.920              | -              |
| Acadl                      | 0.927            | 1.196            | 1.172            | 0.928           | 0.976           | 0.885           | 0.846              | 0.135          |
| Acadm                      | 1.275            | 1.046            | 0.893            | 0.963           | 0.916           | 0.723           | 0.810              | 0.201          |
| Acadvl                     | 1.009            | 1.062            | 1.206            | 0.993           | 0.884           | 0.819           | 0.823              | 0.065          |
| Acat1                      | 1.138            | 1.021            | 1.120            | 1.163           | 0.845           | 0.725           | 0.833              | 0.233          |
| Aco2                       | 1.123            | 1.131            | 1.097            | 0.982           | 0.894           | 0.824           | 0.806              | 0.013          |
| Acot13                     | 0.999            | 1.238            | 1.078            | 1.217           | 0.759           | 0.895           | 0.866              | 0.354          |
| Actc1                      | 1.213            | 1.272            | 1.027            | 0.919           | 0.851           | 0.811           | 0.735              | 0.015          |
| Actn2                      | 1.221            | 1.302            | 1.112            | 0.780           | 0.656           | 0.890           | 0.640              | 0.010          |
| Ak1                        | 1.082            | 1.092            | 0.959            | 1.054           | 0.843           | 0.999           | 0.924              | 0.364          |
| Alb                        | 1.106            | 1.187            | 1.019            | 0.881           | 0.882           | 0.961           | 0.823              | 0.021          |
| Aldh2                      | 0.970            | -                | -                | 1.295           | -               | 0.872           | 1.118              | -              |
| Aldoa                      | 1.101            | 1.060            | 1.086            | 0.910           | 0.911           | 0.976           | 0.861              | 0.004          |
| Atp1a1                     | -                | -                | 1.117            | 0.918           | -               | -               | 0.822              | -              |
| Atp1a2                     | 1.322            | -                | 1.238            | 0.901           | 0.878           | 0.726           | 0.652              | 0.018          |
| Atp2a2                     | 0.858            | 1.325            | 1.290            | 1.013           | 0.848           | 0.765           | 0.756              | 0.175          |
| Atp5f1a                    | 1.072            | 1.270            | 0.980            | 1.022           | 0.889           | 0.743           | 0.799              | 0.130          |
| Atp5f1b                    | 1.101            | 1.304            | 1.107            | 0.965           | 0.750           | 0.797           | 0.715              | 0.023          |
| Atp5f1c                    | 1.126            | 1.151            | 1.094            | 0.904           | 0.796           | -               | 0.756              | 0.012          |
| Atp5f1d                    | 0.966            | 1.264            | 1.010            | 1.021           | 0.869           | 0.927           | 0.869              | 0.230          |
| Atp5f1e                    | 1.118            | 1.211            | 1.114            | 1.079           | 0.766           | 0.692           | 0.737              | 0.078          |
| ATP5IF1                    | 0.862            | 2.293            | 1.576            | 0.921           | 1.019           | 0.393           | 0.493              | 0.162          |
| Atp5mf                     | -                | -                | 1.248            | 1.060           | 0.974           | 0.782           | 0.752              | -              |
| Atp5pd                     | 1.143            | 1.162            | 1.052            | 1.026           | 0.844           | 0.792           | 0.793              | 0.047          |
| Atp5pf                     | 0.915            | 0.924            | 1.184            | 1.053           | 1.004           | -               | 1.021              | 0.819          |
| Atp5po                     | 1.066            | 1.144            | 1.101            | 1.051           | 0.824           | 0.735           | 0.788              | 0.081          |
| Ckm                        | 1.108            | 1.256            | 1.135            | 0.988           | 0.782           | 0.839           | 0.745              | 0.020          |
| Ckmt2                      | 1.186            | 1.325            | 0.988            | 0.899           | 0.863           | 0.556           | 0.663              | 0.072          |
| Clybl                      | 1.236            | 0.909            | -                | 1.013           | -               | -               | 0.945              | -              |
| Cox4i1                     | 1.364            | 1.202            | 1.111            | 1.102           | 0.714           | 0.778           | 0.705              | 0.067          |
| Cox5b                      | 1.148            | 1.116            | 1.154            | 1.021           | 0.826           | 0.796           | 0.773              | 0.075          |
| Cox7a1                     | 1.010            | 1.183            | 1.047            | 1.152           | 0.916           | 0.737           | 0.866              | 0.314          |
| Crat                       | 1.158            | -                | -                | -               | 1.073           | 0.685           | 0.759              | -              |
| Cryab                      | -                | 1.055            | -                | 1.134           | -               | -               | 1.075              | -              |
| Cs                         | 1.074            | 1.138            | 1.115            | 1.140           | 0.858           | 0.725           | 0.819              | 0.240          |
| Csrp3                      | 0.853            | 0.943            | 0.925            | 1.146           | 0.957           | 1.076           | 1.168              | 0.066          |
| Decr1                      | 0.983            | 0.968            | 1.112            | 1.104           | 0.992           | 0.870           | 0.968              | 0.691          |

|          |       |       |       |       |       |       |       |       |
|----------|-------|-------|-------|-------|-------|-------|-------|-------|
| Des      | 1.175 | 1.589 | 0.988 | 0.790 | 0.933 | 0.643 | 0.630 | 0.061 |
| Dlat     | 1.116 | 1.125 | 1.196 | 0.992 | 0.828 | 0.809 | 0.765 | 0.016 |
| Dld      | 1.105 | 1.180 | 1.018 | 0.948 | 0.929 | 0.859 | 0.828 | 0.023 |
| Dlst     | 0.948 | 1.154 | 1.201 | 1.318 | 0.715 | 0.744 | 0.841 | 0.377 |
| Ech1     | 0.932 | 1.161 | 1.241 | 1.120 | 0.762 | 0.825 | 0.812 | 0.214 |
| Echs1    | 1.039 | 1.050 | 1.247 | 0.844 | 0.892 | 0.924 | 0.797 | 0.026 |
| Eci1     | 0.921 | 1.187 | 1.265 | 0.957 | 0.884 | 0.757 | 0.770 | 0.097 |
| Eci2     | 1.081 | 1.083 | 1.135 | 1.065 | 0.679 | -     | 0.793 | 0.457 |
| Eno3     | 1.291 | 1.128 | 1.047 | 0.805 | 0.866 | 0.810 | 0.716 | 0.007 |
| Etfa     | 1.021 | 1.187 | 1.136 | 1.050 | 0.848 | 0.776 | 0.800 | 0.084 |
| Etfb     | 0.953 | 1.130 | 1.098 | 1.182 | 0.905 | 0.776 | 0.900 | 0.427 |
| Etfdh    | 1.132 | 1.085 | 1.162 | 1.001 | 0.795 | 0.819 | 0.774 | 0.025 |
| Fabp3    | 0.968 | 1.587 | 1.054 | 0.946 | 0.888 | 0.882 | 0.753 | 0.228 |
| Fabp4    | -     | 0.948 | 1.253 | -     | 0.907 | 0.932 | 0.836 | 0.349 |
| Fh       | 1.254 | 1.096 | 1.026 | 0.938 | 0.865 | 0.807 | 0.773 | 0.025 |
| Gapdh    | 1.286 | 1.044 | 1.125 | 0.969 | 0.857 | 0.877 | 0.782 | 0.027 |
| Gatd3a   | 1.042 | 1.134 | 1.069 | 1.089 | 0.847 | 0.821 | 0.850 | 0.140 |
| Got2     | 1.119 | 1.121 | 1.100 | 0.964 | 0.848 | 0.879 | 0.806 | 0.027 |
| H3-3a    | 0.968 | 1.011 | 1.151 | 0.853 | 0.951 | 0.991 | 0.893 | 0.177 |
| Hadh     | 0.984 | 1.139 | 1.065 | 1.037 | 0.846 | 0.961 | 0.892 | 0.187 |
| Hadha    | 1.056 | 1.099 | 1.121 | 1.059 | 0.891 | 0.746 | 0.823 | 0.116 |
| Hadhb    | 1.142 | 1.124 | 1.189 | 0.728 | 0.938 | 0.776 | 0.707 | 0.011 |
| Hba      | 1.177 | 1.091 | 1.013 | 1.043 | 0.990 | 0.763 | 0.852 | 0.191 |
| Hbb-b1   | 0.984 | 0.900 | 1.096 | 0.868 | 1.136 | 0.955 | 0.993 | 0.925 |
| Hibch    | 1.069 | 1.120 | 1.089 | 0.983 | 0.699 | -     | 0.770 | 0.351 |
| Hint2    | 1.064 | 1.083 | -     | 1.283 | 0.812 | 0.851 | 0.915 | 0.596 |
| Hsd17b10 | 0.969 | 1.414 | 1.349 | 0.775 | 0.774 | 0.790 | 0.627 | 0.062 |
| Hsd12    | 1.175 | 1.092 | -     | 1.112 | 0.786 | 0.749 | 0.778 | 0.201 |
| Hspa2    | -     | 0.838 | 0.859 | 1.126 | 1.029 | 1.061 | 1.263 | 0.007 |
| Hspa9    | 1.107 | 1.242 | 1.368 | 0.892 | 0.765 | 0.651 | 0.621 | 0.012 |
| Hspd1    | 1.045 | 1.149 | 1.203 | 1.057 | 0.840 | 0.742 | 0.777 | 0.079 |
| Hspe1    | 1.162 | 1.203 | 0.847 | 1.152 | 0.841 | 0.779 | 0.863 | 0.412 |
| Idh2     | 1.185 | 1.134 | 1.076 | 1.007 | 0.767 | 0.748 | 0.743 | 0.037 |
| Idh3a    | 1.121 | 1.128 | 1.148 | 1.041 | 0.839 | 0.791 | 0.786 | 0.096 |
| Immt     | -     | 1.051 | 1.325 | 0.807 | 1.024 | 0.922 | 0.773 | 0.131 |
| Ivd      | 0.972 | 1.093 | 1.057 | 1.004 | 0.973 | 0.948 | 0.937 | 0.171 |
| Ldb3     | 1.185 | 1.147 | 0.886 | 0.989 | 0.935 | 0.918 | 0.883 | 0.285 |
| Letm1    | 0.871 | 1.349 | 1.285 | -     | 0.718 | 0.840 | 0.667 | 0.130 |
| Macrodl  | 0.942 | 1.012 | 1.330 | 1.059 | 0.650 | 0.788 | 0.760 | 0.184 |
| Mb       | 1.113 | 1.169 | 0.974 | 1.005 | 0.975 | 0.846 | 0.868 | 0.137 |
| Mccc1    | 1.027 | 1.120 | 1.153 | 0.831 | 0.752 | 0.886 | 0.748 | 0.008 |
| Mcee     | 1.433 | 1.050 | 1.056 | 1.307 | 0.747 | 0.596 | 0.749 | 0.259 |
| Mdh1     | 1.151 | 1.254 | 0.958 | 0.866 | 0.862 | 0.948 | 0.796 | 0.059 |
| Mdh2     | 1.096 | 0.978 | 1.047 | 1.069 | 0.899 | 0.956 | 0.937 | 0.331 |

|               |       |       |       |       |       |       |       |       |
|---------------|-------|-------|-------|-------|-------|-------|-------|-------|
| Mrpl12        | 1.113 | 0.923 | -     | 0.990 | -     | -     | 0.972 | -     |
| Msra          | -     | -     | 1.112 | -     | -     | 0.824 | 0.741 | -     |
| Mtstp8        | 1.048 | 1.302 | 1.024 | 0.986 | -     | 0.736 | 0.766 | 0.162 |
| Mybpc3        | 1.184 | 1.139 | 1.107 | 0.954 | 0.921 | 0.828 | 0.788 | 0.007 |
| Myh3          | 2.526 | 0.586 | 1.840 | 0.501 | 0.194 | 0.805 | 0.303 | 0.124 |
| Myh4          | 1.445 | 0.923 | 0.942 | 0.709 | 0.852 | 0.929 | 0.752 | 0.182 |
| $\alpha$ -MHC | 1.127 | 1.206 | 1.038 | 1.002 | 0.876 | 0.805 | 0.796 | 0.040 |
| Myh7          | 2.741 | 0.977 | 1.317 | -     | 1.427 | 0.732 | 0.643 | 0.456 |
| Myh7b         | 1.280 | 1.155 | 0.768 | 0.995 | 1.022 | 0.851 | 0.895 | 0.614 |
| Myl2          | 1.192 | 1.060 | 1.004 | 0.884 | 0.969 | 0.883 | 0.840 | 0.044 |
| Myl3          | 1.202 | 1.081 | 0.919 | 1.050 | 0.887 | 0.882 | 0.880 | 0.267 |
| Ndufa10       | 0.532 | 1.333 | 0.894 | 1.514 | -     | -     | 1.647 | -     |
| Ndufa2        | 1.173 | 1.063 | 1.125 | 1.154 | 0.746 | 0.797 | 0.802 | 0.161 |
| Ndufa4        | -     | 1.221 | 1.227 | 0.901 | 0.856 | 0.802 | 0.697 | 0.004 |
| Ndufa5        | 1.228 | 1.080 | 1.130 | 0.893 | 0.728 | 0.772 | 0.696 | 0.007 |
| Ndufa7        | 1.217 | 1.132 | 1.184 | 1.128 | 0.687 | 0.711 | 0.715 | 0.150 |
| Ndufa9        | -     | 1.317 | 1.129 | 1.042 | -     | 0.685 | 0.706 | 0.242 |
| Ndufab1       | 1.188 | 0.981 | 1.234 | 0.900 | -     | 0.842 | 0.768 | 0.072 |
| Ndufs1        | 0.859 | 1.082 | 1.176 | 1.021 | 0.997 | 0.890 | 0.933 | 0.577 |
| Ndufs2        | 1.120 | 1.233 | -     | 0.707 | -     | -     | 0.601 | -     |
| Ndufs6        | 1.274 | 1.164 | 1.021 | 1.088 | 0.802 | 0.788 | 0.774 | 0.099 |
| Ndufs8        | 1.014 | 1.166 | 1.180 | 1.304 | 0.682 | 0.722 | 0.806 | 0.291 |
| Nipsnap2      | 1.043 | 1.150 | 1.120 | 1.020 | 0.650 | 0.750 | 0.730 | 0.072 |
| Nnt           | -     | 0.788 | -     | -     | -     | 0.689 | 0.874 | -     |
| Ogdh          | -     | 1.218 | 0.996 | 1.130 | -     | 0.748 | 0.848 | 0.514 |
| Oxct1         | 1.066 | 1.269 | 1.121 | 1.179 | 0.729 | 0.745 | 0.768 | 0.157 |
| Pcca          | 0.962 | 1.383 | 0.976 | 1.012 | -     | 0.744 | 0.793 | 0.317 |
| Pdha1         | 0.839 | 1.168 | 1.125 | 1.126 | 0.619 | 1.021 | 0.883 | 0.531 |
| Pdhx          | 1.353 | -     | 1.195 | -     | -     | 0.610 | 0.479 | -     |
| Pfkm          | 0.942 | 1.007 | 0.923 | 1.028 | 1.014 | 1.066 | 1.082 | 0.058 |
| Pfkp          | -     | 0.791 | -     | -     | 0.933 | 0.935 | 1.181 | -     |
| Pgam2         | 1.209 | 1.305 | 1.263 | 0.775 | 0.653 | 0.764 | 0.580 | 0.001 |
| Ppif          | 1.095 | 0.998 | -     | 1.280 | -     | 0.718 | 0.954 | 0.795 |
| Prdx5         | 1.219 | 1.116 | 1.069 | 1.068 | 0.764 | 0.887 | 0.799 | 0.090 |
| Sdha          | 1.108 | 1.197 | 0.970 | 1.246 | 0.820 | 0.735 | 0.855 | 0.356 |
| Sdhb          | 1.129 | 1.102 | 1.075 | 1.093 | 0.846 | 0.653 | 0.784 | 0.215 |
| Slc25a11      | 1.016 | 0.816 | 0.981 | 0.933 | 1.275 | 1.009 | 1.144 | 0.325 |
| Slc25a3       | 1.140 | 1.069 | 1.244 | 1.036 | 0.816 | 0.698 | 0.738 | 0.063 |
| Slc25a4       | 1.068 | 1.278 | 1.101 | 0.953 | 0.902 | 0.766 | 0.760 | 0.033 |
| Slc25a5       | 1.018 | -     | -     | 0.925 | -     | -     | 0.909 | -     |
| Sod2          | 0.941 | 1.198 | 1.102 | 0.866 | 0.840 | 1.108 | 0.868 | 0.270 |
| Sucla2        | 1.091 | 1.143 | 1.204 | 1.180 | 0.802 | 0.625 | 0.758 | 0.233 |
| Suclg1        | 0.965 | 1.158 | 1.276 | 1.119 | 0.818 | 0.768 | 0.796 | 0.173 |
| Suclg2        | 1.419 | 0.644 | 0.804 | 1.159 | 1.062 | 0.683 | 1.013 | 0.883 |

|         |       |       |       |       |       |       |       |       |
|---------|-------|-------|-------|-------|-------|-------|-------|-------|
| Tnni3   | 0.998 | 1.091 | 1.088 | 1.130 | 0.888 | 0.773 | 0.878 | 0.286 |
| Tnnt2   | 1.344 | 1.098 | 1.110 | 0.883 | 0.860 | 0.691 | 0.685 | 0.020 |
| Tpm1    | 0.996 | 1.128 | 1.216 | 1.115 | 0.803 | 0.724 | 0.791 | 0.156 |
| Tpm3    | 1.167 | 1.291 | 0.943 | 1.062 | 0.912 | 0.790 | 0.813 | 0.176 |
| Tpm4    | 1.260 | 1.097 | 1.391 | 1.056 | 0.781 | 0.698 | 0.677 | 0.047 |
| Trap1   | 0.807 | 0.759 | 0.852 | 1.280 | 1.157 | 1.159 | 1.487 | 0.001 |
| Tsfm    | -     | 0.841 | -     | 1.308 | -     | -     | 1.555 | -     |
| Ttn     | 1.057 | 1.144 | 1.129 | 1.023 | 0.865 | 0.825 | 0.815 | 0.040 |
| Tufm    | 1.058 | 1.106 | 1.087 | 1.018 | 0.754 | 0.952 | 0.838 | 0.177 |
| Uqcrb   | 1.050 | 1.180 | 1.333 | 1.033 | 0.744 | 0.737 | 0.706 | 0.052 |
| Uqcrc2  | 1.471 | 1.287 | 1.154 | 1.017 | 0.668 | 0.731 | 0.617 | 0.028 |
| Uqcrfs1 | 1.227 | -     | 1.008 | 1.070 | -     | 0.656 | 0.772 | 0.395 |
| Uqcrh   | -     | -     | 1.244 | 1.181 | 0.942 | 0.814 | 0.787 | -     |
| Vdac3   | 1.141 | 1.041 | 0.996 | 0.962 | -     | -     | 0.908 | -     |
| Atp5pb  | 1.171 | 1.143 | 0.973 | 1.107 | 0.830 | 0.825 | 0.840 | 0.186 |

---
