# Supplementary material for: α-myosin heavy chain lactylation maintains sarcomeric structure and function and alleviates the development of heart failure
Source: PubMed Central journal article supplement (PMC10474270; doi:10.1038/s41422-023-00844-w), 2023-07-13
Supplement: 41422_2023_844_MOESM10_ESM.pdf [file 41422_2023_844_MOESM10_ESM.pdf]

**Supplementary information, Table S2 Differential analysis of all 483 overlapping lactylated modified sites between control group and Ang II-induced heart failure group (n = 3).**

| <b>Protein description</b> | <b>Position</b> | <b>Amino acid</b> | <b>Control 1</b> | <b>Control 2</b> | <b>Control 3</b> | <b>Ang II 1</b> | <b>Ang II 2</b> | <b>Ang II 3</b> | <b>Fold change</b> | <b>P value</b> |
|----------------------------|-----------------|-------------------|------------------|------------------|------------------|-----------------|-----------------|-----------------|--------------------|----------------|
| Acaa2                      | 137             | K                 | 1.214            | -                | -                | -               | 0.718           | -               | 0.591              | -              |
| Acaa2                      | 214             | K                 | 0.814            | 1.020            | 1.140            | 1.143           | 0.941           | 0.970           | 1.027              | 0.794          |
| Acaa2                      | 241             | K                 | 0.914            | -                | -                | -               | 0.896           | 1.111           | 1.098              | -              |
| Acaa2                      | 270             | K                 | 0.972            | 1.089            | 1.108            | 0.934           | -               | -               | 0.884              | -              |
| Acad10                     | 1056            | K                 | -                | 0.999            | -                | -               | 0.987           | -               | 0.988              | -              |
| Acad9                      | 242             | K                 | -                | -                | 1.047            | 0.963           | -               | -               | 0.920              | -              |
| Acad1                      | 66              | K                 | 0.800            | -                | -                | -               | 1.137           | 0.956           | 1.308              | -              |
| Acad1                      | 81              | K                 | 1.047            | 1.207            | 1.112            | 0.915           | 0.979           | 0.789           | 0.797              | 0.039          |
| Acad1                      | 95              | K                 | 0.828            | 1.192            | 1.204            | 0.876           | 0.933           | 1.011           | 0.875              | 0.404          |
| Acad1                      | 322             | K                 | 1.034            | 1.190            | 1.201            | 0.994           | 0.853           | 0.784           | 0.768              | 0.035          |
| Acadm                      | 30              | K                 | 1.741            | 0.865            | 0.503            | 0.787           | 1.064           | -               | 0.893              | 0.994          |
| Acadm                      | 212             | K                 | 1.035            | 1.149            | 1.122            | 1.079           | -               | 0.723           | 0.818              | 0.250          |
| Acadm                      | 259             | K                 | 1.049            | 1.124            | 1.053            | 1.024           | 0.762           | -               | 0.830              | 0.183          |
| Acadv1                     | 72              | K                 | -                | -                | 1.143            | -               | 0.887           | -               | 0.776              | -              |
| Acadv1                     | 122             | K                 | 0.871            | 1.094            | 1.155            | 1.023           | -               | -               | 0.984              | -              |
| Acadv1                     | 196             | K                 | 1.010            | 1.169            | 1.168            | 1.164           | 0.774           | 0.771           | 0.809              | 0.190          |
| Acadv1                     | 277             | K                 | 1.017            | 1.175            | 1.199            | 1.048           | 0.903           | 0.713           | 0.786              | 0.112          |
| Acadv1                     | 483             | K                 | 0.890            | 1.111            | 1.792            | 0.883           | 0.777           | 0.673           | 0.615              | 0.112          |
| Acadv1                     | 557             | K                 | 1.097            | 0.748            | -                | 0.847           | 1.080           | 1.118           | 1.100              | 0.600          |
| Acat1                      | 171             | K                 | 0.972            | 1.005            | 1.214            | 1.396           | 0.921           | 0.515           | 0.887              | 0.549          |
| Acat1                      | 199             | K                 | 1.236            | -                | -                | -               | 0.719           | 0.965           | 0.681              | -              |
| Acat1                      | 260             | K                 | 1.127            | -                | 1.131            | 1.137           | 0.788           | 0.777           | 0.798              | 0.230          |
| Acat1                      | 265             | K                 | 1.290            | 1.036            | 1.151            | 0.955           | 0.950           | 0.644           | 0.733              | 0.090          |
| Aco2                       | 31              | K                 | 1.041            | 1.065            | 1.146            | 1.055           | 0.907           | 0.825           | 0.857              | 0.109          |
| Aco2                       | 50              | K                 | 1.144            | 1.086            | 1.133            | 0.913           | 0.942           | 0.819           | 0.795              | 0.007          |
| Aco2                       | 138             | K                 | 1.263            | 1.261            | 0.931            | 0.990           | 0.852           | 0.757           | 0.752              | 0.093          |
| Aco2                       | 401             | K                 | 1.508            | 0.945            | 1.148            | 0.882           | 0.905           | 0.648           | 0.676              | 0.091          |
| Aco2                       | 411             | K                 | -                | 1.181            | 1.037            | 0.905           | -               | 0.982           | 0.851              | 0.172          |
| Aco2                       | 517             | K                 | 1.053            | 1.110            | 1.196            | 1.069           | 0.832           | 0.793           | 0.802              | 0.084          |
| Aco2                       | 523             | K                 | -                | 1.231            | -                | 1.033           | -               | 0.816           | 0.751              | -              |
| Aco2                       | 549             | K                 | 1.068            | 1.157            | 1.037            | 0.975           | 0.844           | -               | 0.836              | 0.078          |
| Aco2                       | 591             | K                 | -                | -                | 1.205            | 0.934           | 0.873           | 0.941           | 0.760              | -              |
| Aco2                       | 605             | K                 | 0.764            | 1.190            | 1.150            | -               | 1.024           | 0.893           | 0.926              | 0.775          |
| Aco2                       | 730             | K                 | 1.143            | 1.084            | 1.110            | 1.068           | 0.871           | 0.770           | 0.812              | 0.088          |
| Acot13                     | 127             | K                 | 1.123            | 1.238            | 1.106            | 1.060           | 0.741           | 0.808           | 0.753              | 0.060          |
| Actc1                      | 52              | K                 | 1.309            | 1.215            | 1.028            | 0.833           | 0.761           | 0.939           | 0.713              | 0.023          |
| Actc1                      | 63              | K                 | 1.268            | 1.202            | 1.144            | 0.967           | 0.784           | 0.731           | 0.687              | 0.013          |
| <b>Actc1</b>               | <b>115</b>      | <b>K</b>          | <b>1.546</b>     | <b>1.283</b>     | <b>1.018</b>     | <b>0.826</b>    | <b>0.787</b>    | <b>0.657</b>    | <b>0.590</b>       | <b>0.021</b>   |
| Actc1                      | 317             | K                 | 0.983            | -                | 0.972            | -               | 1.040           | 0.917           | 1.001              | 0.989          |

|                |            |          |              |              |              |              |              |              |              |              |
|----------------|------------|----------|--------------|--------------|--------------|--------------|--------------|--------------|--------------|--------------|
| Actc1          | 328        | K        | 0.960        | 1.387        | 0.973        | 1.050        | 0.883        | 0.809        | 0.826        | 0.271        |
| Actn2          | 102        | K        | -            | 1.302        | -            | 0.780        | -            | 0.890        | 0.641        | -            |
| Actn2          | 443        | K        | 1.391        | -            | -            | -            | 0.656        | -            | 0.472        | -            |
| Ak1            | 21         | K        | 1.003        | 1.010        | 0.871        | -            | 0.948        | 1.153        | 1.093        | 0.435        |
| Ak1            | 27         | K        | 1.161        | 1.173        | 1.046        | 1.090        | 0.737        | 0.845        | 0.791        | 0.109        |
| Alb            | 212        | K        | -            | 1.359        | 0.856        | 0.991        | 0.950        | -            | 0.876        | 0.693        |
| Alb            | 223        | K        | 1.010        | 1.011        | 1.237        | -            | 0.839        | -            | 0.773        | -            |
| Alb            | 264        | K        | -            | 1.364        | 0.991        | 1.108        | 0.764        | 0.837        | 0.767        | 0.251        |
| Alb            | 376        | K        | -            | -            | 1.115        | -            | 0.774        | -            | 0.694        | -            |
| Alb            | 413        | K        | -            | 1.113        | 1.224        | 0.924        | 0.866        | -            | 0.766        | 0.044        |
| <b>Alb</b>     | <b>490</b> | <b>K</b> | <b>1.154</b> | <b>1.318</b> | <b>1.222</b> | <b>0.808</b> | <b>-</b>     | <b>0.727</b> | <b>0.623</b> | <b>0.005</b> |
| Alb            | 543        | K        | -            | -            | 0.723        | -            | 1.113        | -            | 1.539        | -            |
| Alb            | 549        | K        | 1.114        | 1.198        | 1.057        | -            | -            | 0.769        | 0.685        | -            |
| Alb            | 588        | K        | 1.144        | 0.944        | 0.746        | 0.572        | -            | 1.605        | 1.152        | 0.948        |
| Aldh2          | 370        | K        | 0.768        | -            | -            | 1.295        | -            | -            | 1.686        | -            |
| Aldh2          | 430        | K        | 1.171        | -            | -            | -            | -            | 0.872        | 0.745        | -            |
| Aldoa          | 42         | K        | 1.206        | 1.019        | 1.116        | 0.952        | 0.869        | 0.883        | 0.809        | 0.020        |
| Aldoa          | 147        | K        | 0.995        | 1.011        | 1.041        | 0.923        | 0.975        | 1.049        | 0.967        | 0.429        |
| Aldoa          | 230        | K        | -            | 1.040        | 0.899        | 0.855        | 1.056        | 1.074        | 1.026        | 0.844        |
| Aldoa          | 322        | K        | -            | 1.314        | -            | -            | 0.743        | 0.898        | 0.624        | -            |
| Atp1a1         | 21         | K        | -            | -            | 1.117        | 0.918        | -            | -            | 0.822        | -            |
| <b>Atp1a2</b>  | <b>658</b> | <b>K</b> | <b>1.322</b> | <b>-</b>     | <b>1.238</b> | <b>0.901</b> | <b>0.878</b> | <b>0.726</b> | <b>0.652</b> | <b>0.018</b> |
| Atp2a2         | 205        | K        | 0.966        | 1.292        | -            | -            | -            | 0.879        | 0.779        | -            |
| Atp2a2         | 502        | K        | 0.750        | 1.108        | 1.176        | 0.988        | 0.934        | 1.051        | 0.980        | 0.987        |
| Atp2a2         | 712        | K        | -            | 1.576        | 1.404        | 1.037        | 0.761        | 0.364        | 0.484        | 0.137        |
| Atp5fla        | 161        | K        | 1.073        | 1.409        | 0.262        | 1.128        | 1.148        | -            | 1.244        | 0.562        |
| Atp5fla        | 167        | K        | 1.056        | 1.201        | 1.094        | 1.148        | 0.807        | 0.751        | 0.808        | 0.167        |
| Atp5fla        | 218        | K        | -            | 1.356        | -            | 0.760        | 0.938        | -            | 0.626        | -            |
| <b>Atp5fla</b> | <b>230</b> | <b>K</b> | <b>1.344</b> | <b>1.200</b> | <b>1.162</b> | <b>0.912</b> | <b>0.867</b> | <b>0.555</b> | <b>0.630</b> | <b>0.042</b> |
| Atp5fla        | 239        | K        | -            | 1.244        | -            | 0.898        | -            | -            | 0.722        | -            |
| Atp5fla        | 427        | K        | 1.022        | 1.321        | 1.015        | 1.141        | 0.811        | 0.758        | 0.807        | 0.219        |
| Atp5fla        | 498        | K        | 0.989        | 1.228        | 1.032        | 1.023        | 0.946        | 0.826        | 0.860        | 0.175        |
| Atp5fla        | 531        | K        | 0.966        | 1.230        | 1.161        | 1.052        | 0.848        | 0.802        | 0.805        | 0.118        |
| Atp5fla        | 539        | K        | 1.054        | 1.241        | 1.131        | 1.132        | 0.745        | 0.764        | 0.771        | 0.126        |
| Atp5flb        | 124        | K        | 1.031        | 1.286        | 1.194        | 1.029        | 0.741        | 0.791        | 0.729        | 0.055        |
| Atp5flb        | 201        | K        | 1.122        | 1.351        | 0.984        | 0.933        | -            | 0.741        | 0.726        | 0.119        |
| Atp5flb        | 259        | K        | 1.238        | -            | -            | 0.734        | -            | -            | 0.593        | -            |
| Atp5flb        | 426        | K        | -            | 1.449        | 1.153        | 0.869        | 0.685        | 0.957        | 0.643        | 0.063        |
| Atp5flb        | 522        | K        | 1.042        | 1.166        | 1.222        | 1.202        | 0.685        | 0.752        | 0.769        | 0.181        |
| Atp5flc        | 55         | K        | 1.317        | -            | -            | 0.664        | -            | -            | 0.504        | -            |
| Atp5flc        | 83         | K        | -            | 1.151        | -            | 1.070        | 0.796        | -            | 0.811        | -            |
| Atp5fld        | 136        | K        | 0.966        | 1.264        | 1.010        | 1.021        | 0.869        | 0.927        | 0.869        | 0.230        |
| Atp5fle        | 32         | K        | 1.072        | 1.165        | 1.090        | 1.039        | 0.740        | -            | 0.802        | 0.171        |
| Atp5fle        | 37         | K        | 1.041        | 1.298        | 1.120        | 1.072        | 0.824        | 0.712        | 0.754        | 0.098        |

|               |           |          |              |              |              |              |              |              |              |              |
|---------------|-----------|----------|--------------|--------------|--------------|--------------|--------------|--------------|--------------|--------------|
| Atp5fle       | 44        | K        | 1.241        | 1.171        | 1.132        | 1.127        | 0.735        | 0.672        | 0.715        | 0.089        |
| ATP5IF1       | 64        | K        | 1.087        | 2.456        | 1.507        | 0.921        | 0.832        | 0.393        | 0.425        | 0.073        |
| Atp5mf        | 8         | K        | -            | -            | 1.248        | 1.060        | 0.974        | 0.782        | 0.752        | -            |
| Atp5pb        | 144       | K        | 0.930        | 0.936        | -            | 1.221        | 0.934        | 0.920        | 1.099        | 0.524        |
| Atp5pb        | 225       | K        | 1.103        | 1.255        | 1.257        | 0.992        | 0.761        | 0.718        | 0.684        | 0.023        |
| Atp5pb        | 233       | K        | -            | 1.273        | 1.145        | -            | 0.794        | 0.836        | 0.674        | 0.022        |
| Atp5pd        | 63        | K        | -            | 1.225        | 1.198        | 0.994        | 0.832        | 0.791        | 0.720        | 0.034        |
| Atp5pd        | 72        | K        | 1.083        | -            | 1.121        | 1.003        | 0.780        | -            | 0.809        | 0.226        |
| Atp5pd        | 78        | K        | 0.977        | 1.260        | 1.204        | 1.014        | 0.841        | 0.763        | 0.761        | 0.075        |
| Atp5pd        | 85        | K        | 1.202        | -            | 0.961        | 0.781        | 1.020        | -            | 0.833        | 0.398        |
| Atp5pd        | 95        | K        | 1.228        | 1.067        | 1.091        | 1.032        | 0.855        | 0.768        | 0.784        | 0.062        |
| Atp5pd        | 99        | K        | 1.184        | 1.227        | 0.907        | 1.085        | 0.868        | 0.768        | 0.820        | 0.224        |
| Atp5pd        | 117       | K        | 1.071        | 1.102        | 1.181        | 1.172        | 0.752        | 0.775        | 0.805        | 0.179        |
| Atp5pd        | 149       | K        | -            | -            | 1.065        | 0.967        | -            | -            | 0.908        | -            |
| Atp5pf        | 84        | K        | 1.054        | 0.924        | -            | 0.966        | 1.004        | -            | 0.996        | 0.979        |
| Atp5pf        | 94        | K        | 0.694        | -            | 1.184        | 1.140        | -            | -            | 1.214        | -            |
| <b>Atp5po</b> | <b>51</b> | <b>K</b> | <b>1.342</b> | <b>1.413</b> | <b>1.044</b> | <b>0.920</b> | <b>0.661</b> | <b>0.695</b> | <b>0.599</b> | <b>0.021</b> |
| Atp5po        | 70        | K        | 1.099        | 1.144        | 1.029        | 1.048        | 0.889        | 0.828        | 0.845        | 0.087        |
| Atp5po        | 90        | K        | 1.212        | 1.094        | 1.148        | 1.180        | 0.743        | 0.682        | 0.754        | 0.146        |
| Ckm           | 9         | K        | -            | 1.352        | 0.972        | 1.109        | 0.826        | 0.783        | 0.780        | 0.276        |
| Ckm           | 15        | K        | 1.002        | -            | 1.219        | -            | 0.794        | -            | 0.715        | -            |
| Ckm           | 107       | K        | 1.214        | -            | 1.215        | 0.963        | 0.725        | 0.826        | 0.690        | 0.038        |
| Ckm           | 242       | K        | -            | 1.265        | -            | 0.883        | -            | -            | 0.698        | -            |
| Ckmt2         | 149       | K        | 1.334        | -            | 1.063        | -            | 0.692        | -            | 0.577        | -            |
| Ckmt2         | 209       | K        | 1.341        | 1.352        | 0.912        | 0.899        | 1.034        | 0.556        | 0.690        | 0.165        |
| Cox4i1        | 29        | K        | 1.364        | 1.010        | 1.004        | 1.169        | 0.755        | 0.753        | 0.792        | 0.241        |
| Cox4i1        | 67        | K        | -            | 1.264        | 1.256        | 1.034        | 0.706        | 0.803        | 0.673        | 0.066        |
| Cox4i1        | 78        | K        | -            | 1.332        | 1.084        | -            | 0.682        | -            | 0.565        | -            |
| Cox5b         | 67        | K        | 1.175        | -            | 1.149        | 0.970        | 0.876        | 0.775        | 0.752        | 0.041        |
| Cox5b         | 73        | K        | 1.121        | 1.116        | 1.158        | 1.072        | 0.775        | 0.817        | 0.785        | 0.067        |
| Cox7a1        | 31        | K        | 1.010        | 1.183        | 1.047        | 1.152        | 0.916        | 0.737        | 0.866        | 0.314        |
| Crat          | 186       | K        | 1.158        | -            | -            | -            | 1.073        | 0.685        | 0.759        | -            |
| Cryab         | 90        | K        | -            | 1.055        | -            | 1.134        | -            | -            | 1.075        | -            |
| Cs            | 43        | K        | 1.062        | 1.094        | 1.069        | 1.120        | 0.911        | 0.798        | 0.877        | 0.228        |
| Cs            | 103       | K        | 1.066        | 1.205        | 1.018        | 0.943        | 0.893        | -            | 0.837        | 0.082        |
| Cs            | 321       | K        | 1.094        | 1.069        | 1.139        | 1.223        | 0.795        | 0.752        | 0.839        | 0.266        |
| Cs            | 366       | K        | 1.081        | 1.274        | 1.070        | -            | -            | 0.663        | 0.581        | -            |
| Cs            | 370       | K        | -            | 1.182        | 1.109        | 1.148        | 0.845        | 0.770        | 0.804        | 0.236        |
| Cs            | 450       | K        | 1.069        | 1.176        | 1.278        | 1.145        | 0.778        | 0.644        | 0.729        | 0.125        |
| Cs            | 459       | K        | -            | 1.009        | 1.122        | 1.340        | 0.857        | 0.725        | 0.914        | 0.643        |
| Csrp3         | 109       | K        | 0.711        | 0.906        | 0.939        | 1.149        | 0.999        | 1.146        | 1.289        | 0.059        |
| Csrp3         | 113       | K        | 0.995        | 0.980        | 0.910        | 1.142        | 0.914        | 1.005        | 1.061        | 0.471        |
| Decr1         | 97        | K        | 0.988        | 0.777        | 0.999        | 1.087        | 1.179        | 0.975        | 1.173        | 0.175        |
| Decr1         | 106       | K        | 0.978        | 1.158        | 1.225        | 1.121        | 0.804        | 0.765        | 0.800        | 0.166        |

|             |            |          |              |              |              |          |              |              |              |              |
|-------------|------------|----------|--------------|--------------|--------------|----------|--------------|--------------|--------------|--------------|
| Des         | 124        | K        | 1.204        | 1.164        | 1.023        | 0.804    | 0.933        | 0.939        | 0.789        | 0.029        |
| Des         | 298        | K        | 0.599        | 2.548        | -            | -        | -            | 0.347        | 0.221        | -            |
| Des         | 308        | K        | 1.723        | 1.056        | 0.953        | 0.776    | -            | -            | 0.624        | -            |
| Dlat        | 363        | K        | -            | 1.250        | -            | 1.079    | 0.834        | 0.807        | 0.725        | -            |
| Dlat        | 371        | K        | 1.217        | 0.994        | 1.182        | 0.982    | 0.856        | 0.811        | 0.781        | 0.044        |
| Dlat        | 468        | K        | -            | 1.132        | 1.210        | 0.914    | 0.794        | -            | 0.729        | 0.055        |
| Dld         | 66         | K        | -            | 1.121        | 1.028        | 1.034    | -            | 0.857        | 0.880        | 0.332        |
| Dld         | 132        | K        | 0.990        | 1.197        | 1.102        | 0.956    | 0.955        | 0.832        | 0.834        | 0.066        |
| Dld         | 143        | K        | 1.058        | 1.266        | 1.136        | 0.925    | 0.842        | 0.818        | 0.747        | 0.011        |
| Dld         | 430        | K        | 0.937        | 1.136        | 1.200        | 0.841    | 0.989        | 0.929        | 0.843        | 0.132        |
| Dlst        | 155        | K        | 0.838        | 1.100        | 1.249        | 1.456    | 0.725        | 0.710        | 0.907        | 0.616        |
| Dlst        | 218        | K        | 1.058        | 1.207        | 1.152        | 1.180    | 0.705        | 0.778        | 0.779        | 0.167        |
| Ech1        | 76         | K        | 0.932        | 1.161        | 1.241        | 1.120    | 0.762        | 0.825        | 0.812        | 0.214        |
| Echs1       | 43         | K        | 0.960        | 1.105        | 1.283        | 0.771    | 0.979        | 0.924        | 0.799        | 0.114        |
| Echs1       | 101        | K        | 1.118        | 0.954        | 1.210        | 0.916    | 0.805        | -            | 0.787        | 0.103        |
| Eci1        | 76         | K        | 0.976        | 1.094        | 1.174        | 0.958    | -            | -            | 0.886        | -            |
| Eci1        | 255        | K        | 0.866        | 1.279        | 1.355        | 0.955    | -            | 0.757        | 0.734        | 0.236        |
| Eci2        | 60         | K        | 1.081        | 1.083        | 1.135        | 1.065    | 0.679        | -            | 0.793        | 0.226        |
| Eno3        | 28         | K        | 1.714        | -            | 0.606        | -        | -            | 0.714        | 0.616        | -            |
| Eno3        | 64         | K        | 1.233        | -            | -            | 0.857    | 0.863        | -            | 0.697        | -            |
| Eno3        | 71         | K        | -            | -            | 1.397        | 0.683    | 0.868        | -            | 0.555        | -            |
| Eno3        | 420        | K        | 1.189        | 1.072        | 1.139        | 0.875    | 0.867        | -            | 0.769        | 0.007        |
| Etfa        | 59         | K        | 1.002        | 1.167        | 1.004        | 1.023    | 0.935        | 0.907        | 0.903        | 0.180        |
| Etfa        | 62         | K        | 0.925        | 1.317        | -            | 1.098    | 0.688        | -            | 0.797        | 0.500        |
| Etfa        | 75         | K        | 0.931        | -            | -            | -        | 1.025        | -            | 1.101        | -            |
| Etfa        | 206        | K        | 0.985        | -            | -            | 1.004    | -            | -            | 1.019        | -            |
| <b>Etfa</b> | <b>216</b> | <b>K</b> | <b>1.227</b> | <b>1.238</b> | <b>1.193</b> | <b>-</b> | <b>0.756</b> | <b>0.627</b> | <b>0.567</b> | <b>0.004</b> |
| Etfa        | 226        | K        | 1.056        | 1.089        | 1.171        | 1.082    | 0.848        | 0.793        | 0.821        | 0.108        |
| Etfa        | 294        | K        | -            | 1.122        | 1.175        | 1.044    | 0.710        | -            | 0.764        | 0.276        |
| Etfb        | 26         | K        | 0.825        | 1.018        | -            | 1.349    | -            | 0.881        | 1.210        | 0.541        |
| Etfb        | 116        | K        | -            | -            | 1.017        | 1.135    | 0.962        | 0.845        | 0.964        | -            |
| Etfb        | 238        | K        | -            | 1.190        | 1.162        | 1.109    | -            | 0.663        | 0.753        | 0.345        |
| Etfb        | 248        | K        | 1.050        | 1.182        | 1.115        | 1.136    | 0.847        | 0.716        | 0.806        | 0.170        |
| Etfdh       | 222        | K        | 1.132        | 1.138        | 1.162        | 1.001    | 0.795        | 0.819        | 0.762        | 0.019        |
| Fabp3       | 15         | K        | 0.637        | -            | 1.189        | 1.226    | 0.905        | 0.882        | 1.100        | 0.659        |
| Fabp3       | 91         | K        | 1.208        | 1.587        | 0.919        | 0.666    | 0.871        | -            | 0.621        | 0.135        |
| Fabp4       | 121        | K        | -            | 0.948        | 1.253        | -        | 0.907        | 0.932        | 0.836        | 0.349        |
| Fh          | 58         | K        | 1.716        | 0.722        | 0.500        | 0.814    | 1.130        | 1.082        | 1.030        | 0.699        |
| Fh          | 63         | K        | 1.007        | 1.219        | 1.141        | 1.060    | 0.654        | -            | 0.764        | 0.225        |
| Fh          | 169        | K        | -            | 1.232        | 1.016        | 0.891    | -            | -            | 0.793        | -            |
| Fh          | 170        | K        | 1.199        | -            | 1.237        | -        | -            | 0.610        | 0.501        | -            |
| Fh          | 220        | K        | 1.094        | 1.212        | 1.229        | 0.988    | 0.810        | 0.728        | 0.715        | 0.024        |
| Gapdh       | 192        | K        | -            | 0.977        | 1.089        | 0.994    | 0.939        | 0.937        | 0.926        | 0.210        |
| Gapdh       | 213        | K        | 1.286        | 1.111        | 1.160        | 0.943    | 0.774        | 0.817        | 0.712        | 0.010        |

|        |     |   |       |       |       |       |       |       |       |       |
|--------|-----|---|-------|-------|-------|-------|-------|-------|-------|-------|
| Gatd3a | 149 | K | 1.123 | 1.117 | 0.987 | 1.251 | 0.803 | 0.792 | 0.882 | 0.398 |
| Gatd3a | 155 | K | -     | 1.014 | 1.092 | 0.981 | -     | -     | 0.932 | -     |
| Gatd3a | 162 | K | -     | 1.319 | -     | 0.838 | -     | -     | 0.635 | -     |
| Gatd3a | 186 | K | 0.834 | 1.201 | 1.294 | 1.238 | 0.648 | 0.859 | 0.825 | 0.414 |
| Gatd3a | 201 | K | 1.004 | 0.893 | 0.868 | 1.170 | 1.091 | 1.022 | 1.187 | 0.044 |
| Gatd3a | 217 | K | 1.143 | 1.099 | -     | 0.980 | 0.859 | -     | 0.820 | 0.101 |
| Gatd3a | 221 | K | 1.043 | 1.158 | 1.108 | 1.224 | 0.809 | 0.723 | 0.833 | 0.270 |
| Gatd3a | 231 | K | 1.107 | 1.267 | 1.063 | 1.031 | 0.869 | 0.710 | 0.759 | 0.077 |
| Got2   | 82  | K | 1.315 | -     | 0.968 | 0.958 | 0.877 | 0.856 | 0.786 | 0.156 |
| Got2   | 90  | K | 1.182 | 1.249 | -     | 0.922 | 0.849 | 0.834 | 0.714 | 0.005 |
| Got2   | 122 | K | 1.085 | 1.095 | 1.108 | 0.994 | 0.849 | 0.910 | 0.837 | 0.018 |
| Got2   | 338 | K | 1.064 | 1.151 | 1.138 | 1.043 | 0.840 | 0.812 | 0.804 | 0.053 |
| Got2   | 363 | K | 1.067 | -     | 1.192 | 0.903 | 0.826 | -     | 0.765 | 0.064 |
| H3-3a  | 24  | K | 0.989 | 1.131 | 1.048 | 0.951 | 0.917 | -     | 0.884 | 0.102 |
| H3-3a  | 80  | K | 0.946 | 0.911 | 1.416 | 0.754 | 0.985 | 0.991 | 0.834 | 0.371 |
| Hadh   | 68  | K | -     | 1.152 | 1.141 | -     | 0.848 | -     | 0.740 | -     |
| Hadh   | 81  | K | 0.986 | 1.181 | 1.113 | -     | 0.805 | -     | 0.736 | -     |
| Hadh   | 87  | K | 1.022 | -     | 1.050 | 1.052 | 0.885 | 0.918 | 0.919 | 0.292 |
| Hadh   | 312 | K | 1.037 | 1.051 | 0.954 | 1.021 | -     | -     | 1.007 | -     |
| Hadha  | 46  | K | 1.042 | 1.054 | 1.195 | 0.950 | 0.755 | -     | 0.777 | 0.088 |
| Hadha  | 60  | K | 0.894 | 1.203 | 1.287 | 1.116 | 0.823 | 0.738 | 0.791 | 0.227 |
| Hadha  | 262 | K | -     | 1.138 | 1.368 | -     | -     | 0.637 | 0.508 | -     |
| Hadha  | 284 | K | -     | 1.257 | 0.972 | 0.891 | -     | -     | 0.799 | -     |
| Hadha  | 295 | K | 0.901 | 1.057 | 1.164 | 1.099 | 0.783 | -     | 0.904 | 0.540 |
| Hadha  | 309 | K | 1.028 | -     | -     | -     | 1.059 | 0.800 | 0.904 | -     |
| Hadha  | 350 | K | -     | -     | 0.356 | -     | 1.514 | -     | 4.253 | -     |
| Hadha  | 353 | K | 1.022 | 1.225 | -     | 1.029 | 0.906 | 0.789 | 0.808 | 0.171 |
| Hadha  | 390 | K | 1.512 | 1.082 | 1.025 | 1.014 | -     | 0.430 | 0.599 | 0.198 |
| Hadha  | 406 | K | 1.002 | 1.186 | 1.391 | 1.014 | 0.753 | 0.714 | 0.693 | 0.063 |
| Hadha  | 415 | K | 1.090 | 1.109 | 1.253 | 0.984 | 0.863 | 0.735 | 0.748 | 0.036 |
| Hadha  | 489 | K | -     | 1.180 | 1.068 | 1.028 | 0.932 | 0.885 | 0.844 | 0.086 |
| Hadha  | 516 | K | -     | 0.841 | 1.035 | 1.253 | -     | -     | 1.336 | -     |
| Hadha  | 519 | K | 1.079 | 1.071 | 1.187 | 1.073 | 0.809 | 0.826 | 0.812 | 0.089 |
| Hadha  | 569 | K | 0.979 | 1.147 | 1.265 | 1.063 | 0.817 | 0.780 | 0.784 | 0.113 |
| Hadha  | 634 | K | 1.060 | 1.118 | 1.030 | 1.212 | 0.740 | 0.896 | 0.888 | 0.393 |
| Hadha  | 644 | K | 1.096 | 1.055 | 1.225 | 1.108 | 0.832 | 0.723 | 0.789 | 0.133 |
| Hadhb  | 202 | K | -     | -     | 1.229 | -     | -     | 0.862 | 0.701 | -     |
| Hadhb  | 255 | K | 1.473 | 1.117 | -     | 0.165 | 1.167 | -     | 0.514 | 0.391 |
| Hadhb  | 273 | K | 1.059 | 1.191 | 1.220 | -     | 0.850 | 0.719 | 0.678 | 0.019 |
| Hadhb  | 278 | K | 1.161 | 1.212 | 1.095 | 1.023 | 0.797 | 0.748 | 0.740 | 0.037 |
| Hba    | 8   | K | -     | 1.055 | 1.078 | 1.003 | 0.873 | 0.845 | 0.850 | 0.095 |
| Hba    | 12  | K | 0.947 | 1.236 | 1.109 | 1.152 | 0.888 | 0.727 | 0.841 | 0.295 |
| Hba    | 17  | K | -     | 1.085 | 1.049 | 0.997 | 0.911 | 0.819 | 0.852 | 0.116 |
| Hba    | 41  | K | 1.229 | -     | 0.906 | -     | 1.171 | 0.692 | 0.873 | 0.653 |

|                 |            |          |              |              |              |              |              |              |              |              |
|-----------------|------------|----------|--------------|--------------|--------------|--------------|--------------|--------------|--------------|--------------|
| Hba             | 57         | K        | 1.154        | 1.313        | 1.059        | 1.021        | 0.851        | 0.731        | 0.738        | 0.055        |
| Hba             | 140        | K        | 1.377        | 0.767        | 0.875        | -            | 1.248        | -            | 1.240        | -            |
| Hbb-b1          | 67         | K        | 0.748        | 0.857        | 0.953        | 0.921        | 1.314        | 1.089        | 1.299        | 0.108        |
| Hbb-b1          | 96         | K        | -            | 0.733        | -            | 0.796        | 1.169        | 1.033        | 1.363        | -            |
| Hbb-b1          | 145        | K        | 1.220        | 1.109        | 1.239        | 0.888        | 0.925        | 0.744        | 0.717        | 0.011        |
| Hibch           | 352        | K        | 1.069        | 1.120        | 1.232        | 0.983        | 0.699        | -            | 0.738        | 0.105        |
| Hint2           | 128        | K        | 1.064        | 1.083        | -            | 1.283        | 0.812        | 0.851        | 0.915        | 0.596        |
| <b>Hsd17b10</b> | <b>107</b> | <b>K</b> | <b>0.969</b> | <b>1.414</b> | <b>1.349</b> | <b>0.775</b> | <b>0.774</b> | <b>0.790</b> | <b>0.627</b> | <b>0.019</b> |
| Hsd12           | 390        | K        | 1.175        | -            | -            | 1.112        | 0.786        | 0.749        | 0.751        | -            |
| Hspa2           | 72         | K        | -            | 0.838        | 0.859        | 1.126        | 1.029        | 1.061        | 1.263        | 0.007        |
| Hspa9           | 135        | K        | 1.254        | 1.287        | 1.286        | 1.091        | 0.548        | 0.623        | 0.591        | 0.054        |
| Hspa9           | 138        | K        | 1.070        | -            | 1.492        | -            | 0.825        | 0.613        | 0.561        | 0.123        |
| Hspa9           | 300        | K        | 0.936        | -            | -            | -            | 0.999        | -            | 1.067        | -            |
| Hspa9           | 567        | K        | 1.133        | 1.098        | 1.092        | 1.186        | -            | 0.587        | 0.800        | 0.360        |
| Hspa9           | 600        | K        | -            | 1.360        | 1.810        | 0.286        | 0.699        | -            | 0.311        | 0.116        |
| Hspa9           | 625        | K        | 1.141        | 1.223        | 1.159        | 1.006        | 0.753        | 0.781        | 0.721        | 0.023        |
| Hspd1           | 133        | K        | 0.997        | 1.193        | 1.194        | 1.134        | 0.753        | 0.769        | 0.785        | 0.153        |
| Hspd1           | 250        | K        | 1.093        | 1.104        | 1.212        | 0.979        | 0.927        | 0.714        | 0.769        | 0.058        |
| Hspe1           | 40         | K        | 0.976        | 1.276        | 1.184        | 1.072        | 0.829        | 0.743        | 0.769        | 0.118        |
| Hspe1           | 54         | K        | 1.451        | 1.198        | 0.108        | 1.410        | 0.921        | 0.926        | 1.181        | 0.506        |
| Hspe1           | 56         | K        | 1.058        | 1.288        | 1.248        | 1.061        | 0.772        | 0.668        | 0.696        | 0.065        |
| Hspe1           | 66         | K        | -            | 1.049        | -            | 1.066        | -            | -            | 1.016        | -            |
| Idh2            | 45         | K        | 1.576        | 0.982        | -            | 0.985        | -            | 0.601        | 0.620        | 0.295        |
| Idh2            | 155        | K        | 1.099        | 1.082        | 1.163        | 0.874        | 0.812        | -            | 0.756        | 0.006        |
| Idh2            | 180        | K        | 0.967        | 1.247        | 1.187        | 1.066        | 0.695        | 0.904        | 0.784        | 0.160        |
| Idh2            | 199        | K        | -            | 1.137        | 1.131        | -            | -            | 0.775        | 0.683        | -            |
| Idh2            | 272        | K        | 1.210        | -            | 1.073        | 1.226        | 0.747        | 0.774        | 0.802        | 0.329        |
| Idh2            | 280        | K        | 0.977        | 1.097        | 1.064        | 0.982        | -            | -            | 0.939        | -            |
| Idh2            | 282        | K        | 1.181        | 1.260        | 1.126        | 0.986        | 0.813        | 0.687        | 0.697        | 0.027        |
| Idh2            | 384        | K        | 1.288        | -            | 0.869        | 0.930        | -            | -            | 0.862        | -            |
| Idh3a           | 58         | K        | 1.136        | 1.228        | 1.134        | 0.936        | 0.840        | 0.782        | 0.731        | 0.006        |
| Idh3a           | 223        | K        | 1.147        | 1.170        | 1.130        | 1.111        | 0.759        | 0.747        | 0.759        | 0.088        |
| Idh3a           | 336        | K        | -            | 0.802        | -            | 1.296        | -            | -            | 1.616        | -            |
| Idh3a           | 343        | K        | 1.080        | 1.151        | 1.220        | 0.994        | 0.810        | 0.800        | 0.755        | 0.022        |
| Idh3a           | 350        | K        | -            | 1.289        | 1.106        | 0.867        | 0.947        | 0.835        | 0.737        | 0.027        |
| Immt            | 435        | K        | -            | -            | 1.579        | 0.513        | -            | -            | 0.325        | -            |
| Immt            | 450        | K        | -            | 1.051        | -            | 0.929        | 1.024        | 0.922        | 0.912        | -            |
| Ivd             | 76         | K        | 0.994        | 1.093        | 1.057        | 1.004        | 0.950        | 0.948        | 0.923        | 0.076        |
| Ldb3            | 218        | K        | 1.185        | 1.104        | 1.029        | 0.983        | 0.873        | 0.883        | 0.825        | 0.026        |
| Ldb3            | 507        | K        | -            | 1.190        | 0.743        | 0.995        | 0.996        | 0.953        | 1.015        | 0.825        |
| Letm1           | 458        | K        | 0.871        | 1.349        | 1.285        | -            | 0.718        | 0.840        | 0.667        | 0.130        |
| Macrodl         | 101        | K        | 1.012        | -            | -            | 0.964        | -            | -            | 0.953        | -            |
| Macrodl         | 131        | K        | 0.997        | 1.046        | 1.265        | 1.154        | 0.808        | 0.788        | 0.831        | 0.244        |
| Macrodl         | 207        | K        | 0.818        | 0.978        | 1.676        | -            | 0.491        | -            | 0.424        | -            |

|               |            |          |              |              |              |              |              |              |              |              |
|---------------|------------|----------|--------------|--------------|--------------|--------------|--------------|--------------|--------------|--------------|
| Mb            | 43         | K        | -            | -            | 0.837        | -            | 1.133        | -            | 1.354        | -            |
| Mb            | 51         | K        | 1.090        | 1.118        | 1.079        | 1.078        | 0.978        | 0.708        | 0.841        | 0.213        |
| Mb            | 57         | K        | 1.065        | 1.242        | 1.148        | 1.085        | 0.812        | 0.716        | 0.756        | 0.089        |
| Mb            | 64         | K        | 1.293        | 0.799        | 0.980        | 0.890        | 1.046        | 0.988        | 0.952        | 0.839        |
| Mb            | 78         | K        | -            | -            | 0.688        | 0.947        | 1.189        | 1.130        | 1.582        | -            |
| Mb            | 80         | K        | 1.098        | 1.321        | 1.099        | 0.952        | 0.903        | 0.685        | 0.722        | 0.050        |
| Mb            | 97         | K        | 1.018        | 1.365        | 0.988        | 1.078        | 0.766        | 0.848        | 0.799        | 0.195        |
| Mccc1         | 233        | K        | 1.027        | 1.064        | 1.148        | 1.172        | 0.752        | 0.886        | 0.868        | 0.303        |
| Mccc1         | 692        | K        | -            | 1.175        | 1.352        | 0.489        | -            | -            | 0.387        | -            |
| Mcee          | 152        | K        | 1.433        | 1.050        | 1.056        | 1.307        | 0.747        | 0.596        | 0.749        | 0.259        |
| Mdh1          | 110        | K        | 1.122        | -            | -            | 0.875        | -            | -            | 0.780        | -            |
| Mdh1          | 118        | K        | 1.179        | 1.268        | 0.958        | 0.811        | 0.862        | -            | 0.737        | 0.074        |
| Mdh1          | 205        | K        | -            | 1.239        | -            | 0.912        | -            | 0.948        | 0.751        | -            |
| Mdh2          | 78         | K        | 1.008        | 0.524        | 0.677        | -            | 1.179        | 1.573        | 1.869        | 0.093        |
| Mdh2          | 239        | K        | 1.116        | 1.102        | 1.150        | 1.239        | 0.751        | 0.691        | 0.796        | 0.224        |
| Mdh2          | 301        | K        | 1.104        | 1.223        | 1.195        | 0.939        | 0.825        | 0.771        | 0.720        | 0.007        |
| Mdh2          | 307        | K        | 1.157        | 1.063        | 1.167        | 1.029        | 0.840        | 0.788        | 0.784        | 0.044        |
| Mrpl12        | 181        | K        | 1.188        | 0.923        | -            | 1.016        | -            | -            | 0.963        | -            |
| Msra          | 183        | K        | -            | -            | 1.112        | -            | -            | 0.824        | 0.741        | -            |
| Mtstp8        | 48         | K        | 1.048        | 1.302        | 1.024        | 0.986        | -            | 0.736        | 0.766        | 0.162        |
| Mybpc3        | 87         | K        | 1.135        | 1.150        | -            | 0.635        | -            | 1.148        | 0.780        | 0.429        |
| Mybpc3        | 193        | K        | -            | 1.027        | 0.893        | -            | 1.059        | 0.961        | 1.052        | 0.603        |
| Mybpc3        | 414        | K        | -            | -            | 1.088        | 1.135        | -            | 0.740        | 0.862        | -            |
| <b>Mybpc3</b> | <b>561</b> | <b>K</b> | <b>1.234</b> | <b>1.240</b> | <b>1.233</b> | <b>1.048</b> | <b>0.782</b> | <b>0.599</b> | <b>0.655</b> | <b>0.050</b> |
| Mybpc3        | 1151       | K        | 1.183        | -            | 1.213        | 1.002        | -            | 0.694        | 0.708        | 0.188        |
| Myh3          | 1871       | K        | 2.526        | 0.586        | 1.840        | 0.501        | 0.194        | 0.805        | 0.303        | 0.124        |
| Myh4          | 857        | K        | 1.161        | -            | -            | -            | 0.883        | -            | 0.761        | -            |
| Myh4          | 922        | K        | 0.948        | 0.923        | 0.828        | 1.039        | 1.265        | 0.929        | 1.198        | 0.155        |
| Myh4          | 1455       | K        | 2.313        | -            | 1.137        | 0.378        | 0.408        | -            | 0.228        | 0.058        |
| Myh7          | 383        | K        | 2.534        | -            | -            | -            | 1.610        | -            | 0.635        | -            |
| Myh7          | 559        | K        | -            | 1.108        | -            | -            | 1.230        | -            | 1.110        | -            |
| Myh7          | 942        | K        | 2.947        | 0.856        | 1.317        | -            | 1.441        | 0.732        | 0.637        | 0.533        |
| Myh7b         | 958        | K        | 1.254        | 1.349        | 0.656        | 0.975        | 1.080        | 0.781        | 0.870        | 0.708        |
| Myh7b         | 959        | K        | 1.305        | 0.960        | 0.880        | 1.014        | 0.964        | 0.920        | 0.921        | 0.610        |
| Myl2          | 62         | K        | 1.008        | 1.248        | 1.215        | 0.968        | 0.903        | 0.737        | 0.751        | 0.053        |
| Myl2          | 111        | K        | 0.921        | 1.215        | 1.156        | 1.099        | 0.823        | 0.849        | 0.842        | 0.237        |
| Myl2          | 115        | K        | 1.989        | 0.600        | 0.467        | 0.374        | 1.391        | 1.072        | 0.928        | 1.000        |
| Myl2          | 165        | K        | 1.098        | 1.035        | 1.178        | 1.096        | 0.759        | 0.874        | 0.824        | 0.147        |
| Myl3          | 19         | K        | 1.080        | 0.946        | 0.888        | 0.958        | 0.948        | 1.156        | 1.051        | 0.604        |
| Myl3          | 42         | K        | -            | 1.061        | 1.127        | 1.100        | 0.865        | 0.815        | 0.847        | 0.244        |
| Myl3          | 50         | K        | 1.540        | -            | 0.485        | 1.075        | -            | -            | 1.062        | -            |
| Myl3          | 79         | K        | 1.294        | 0.999        | 1.069        | -            | 0.830        | -            | 0.741        | -            |
| Myl3          | 109        | K        | 1.105        | 1.344        | 0.959        | 1.040        | 0.874        | 0.750        | 0.782        | 0.145        |
| Myl3          | 134        | K        | 0.952        | 1.188        | 0.984        | 1.032        | 1.056        | 0.805        | 0.926        | 0.514        |

|               |           |          |              |              |              |              |              |          |              |              |
|---------------|-----------|----------|--------------|--------------|--------------|--------------|--------------|----------|--------------|--------------|
| Ndufa10       | 122       | K        | -            | -            | 0.620        | 1.514        | -            | -        | 2.442        | -            |
| Ndufa2        | 13        | K        | 1.173        | 1.063        | 1.125        | 1.154        | 0.746        | 0.797    | 0.802        | 0.161        |
| Ndufa4        | 10        | K        | -            | 1.213        | 1.227        | -            | 0.856        | 0.802    | 0.680        | 0.007        |
| Ndufa4        | 74        | K        | -            | 1.228        | -            | 0.901        | 0.856        | -        | 0.715        | -            |
| Ndufa5        | 40        | K        | 1.183        | 1.162        | 1.131        | 1.024        | 0.758        | 0.772    | 0.735        | 0.032        |
| <b>Ndufa5</b> | <b>46</b> | <b>K</b> | <b>1.272</b> | <b>1.071</b> | <b>1.128</b> | <b>0.761</b> | <b>0.697</b> | <b>-</b> | <b>0.630</b> | <b>0.008</b> |
| Ndufa7        | 80        | K        | 1.217        | 1.132        | 1.184        | 1.128        | 0.687        | 0.711    | 0.715        | 0.088        |
| Ndufa9        | 175       | K        | -            | -            | 1.129        | 1.042        | -            | -        | 0.923        | -            |
| Ndufa9        | 370       | K        | -            | 1.317        | -            | -            | -            | 0.685    | 0.520        | -            |
| Ndufab1       | 97        | K        | 1.188        | 0.981        | 1.234        | 0.900        | -            | 0.842    | 0.768        | 0.072        |
| Ndufs1        | 84        | K        | 0.935        | 0.977        | 1.106        | 1.105        | 0.929        | 0.982    | 0.999        | 0.992        |
| Ndufs1        | 450       | K        | 0.782        | 1.132        | 1.246        | -            | 1.064        | 0.798    | 0.884        | 0.627        |
| Ndufs1        | 467       | K        | -            | 1.138        | -            | 0.937        | -            | -        | 0.823        | -            |
| Ndufs2        | 425       | K        | 1.120        | 1.233        | -            | 0.707        | -            | -        | 0.601        | -            |
| Ndufs6        | 41        | K        | 1.274        | -            | -            | -            | 0.798        | 0.788    | 0.622        | -            |
| Ndufs6        | 100       | K        | -            | 1.164        | 1.021        | 1.088        | 0.805        | -        | 0.866        | 0.451        |
| Ndufs8        | 42        | K        | 1.070        | 1.053        | 1.208        | 1.429        | 0.615        | 0.691    | 0.821        | 0.371        |
| Ndufs8        | 51        | K        | 0.958        | 1.278        | 1.152        | 1.179        | 0.749        | 0.753    | 0.791        | 0.220        |
| Nipsnap2      | 53        | K        | 1.157        | -            | 1.101        | -            | 0.663        | -        | 0.587        | -            |
| Nipsnap2      | 63        | K        | 0.937        | 1.072        | -            | 1.066        | -            | -        | 1.061        | -            |
| Nipsnap2      | 94        | K        | 0.996        | 1.229        | 1.147        | 0.970        | -            | 0.750    | 0.765        | 0.117        |
| Nipsnap2      | 140       | K        | 1.082        | 1.150        | 1.112        | 1.025        | 0.637        | -        | 0.746        | 0.170        |
| Nnt           | 1079      | K        | -            | 0.788        | -            | -            | -            | 0.689    | 0.874        | -            |
| Ogdh          | 564       | K        | -            | 1.221        | -            | -            | -            | 0.809    | 0.663        | -            |
| Ogdh          | 999       | K        | -            | 1.372        | 1.020        | -            | -            | 0.686    | 0.574        | -            |
| Ogdh          | 1000      | K        | -            | -            | 0.932        | 1.130        | -            | -        | 1.212        | -            |
| Oxct1         | 176       | K        | 1.090        | 1.203        | 1.089        | 1.198        | 0.793        | 0.729    | 0.804        | 0.199        |
| Oxct1         | 446       | K        | 1.041        | 1.187        | 1.153        | 1.159        | 0.790        | 0.761    | 0.802        | 0.164        |
| Oxct1         | 455       | K        | -            | 1.416        | -            | -            | 0.604        | -        | 0.427        | -            |
| Pcca          | 184       | K        | 0.962        | 1.383        | 0.976        | 1.012        | -            | 0.744    | 0.793        | 0.317        |
| Pdha1         | 63        | K        | 0.668        | -            | -            | -            | -            | 1.258    | 1.883        | -            |
| Pdha1         | 244       | K        | -            | -            | 1.005        | 1.043        | -            | -        | 1.038        | -            |
| Pdha1         | 313       | K        | 1.010        | 1.224        | 1.244        | 1.208        | 0.619        | 0.784    | 0.751        | 0.195        |
| Pdhx          | 218       | K        | 1.353        | -            | 1.195        | -            | -            | 0.610    | 0.479        | -            |
| Pfkm          | 678       | K        | 0.942        | 1.007        | 0.923        | 1.028        | 1.014        | 1.066    | 1.082        | 0.058        |
| Pfkp          | 687       | K        | -            | 0.791        | -            | -            | 0.933        | 0.935    | 1.181        | -            |
| Pgam2         | 100       | K        | -            | 1.428        | 1.435        | 0.395        | -            | -        | 0.276        | -            |
| Pgam2         | 251       | K        | 1.209        | 1.182        | 1.256        | 1.029        | 0.653        | 0.764    | 0.671        | 0.036        |
| Ppif          | 85        | K        | -            | 0.998        | -            | 1.065        | -            | -        | 1.067        | -            |
| Prdx5         | 79        | K        | 1.184        | 1.085        | 1.069        | 1.068        | 0.759        | 0.871    | 0.808        | 0.100        |
| Prdx5         | 112       | K        | 1.254        | 1.146        | -            | -            | 0.769        | 0.902    | 0.696        | 0.058        |
| Sdha          | 179       | K        | 1.087        | 1.103        | 1.096        | 1.172        | 0.804        | 0.788    | 0.841        | 0.215        |
| Sdha          | 182       | K        | 1.310        | 1.255        | -            | 1.064        | 0.763        | 0.637    | 0.640        | 0.095        |
| Sdha          | 250       | K        | 1.057        | 1.489        | 1.092        | -            | -            | 0.453    | 0.374        | -            |



|             |            |          |              |              |          |          |              |              |              |              |
|-------------|------------|----------|--------------|--------------|----------|----------|--------------|--------------|--------------|--------------|
| Sdha        | 335        | K        | 1.130        | 1.179        | 1.211    | 1.038    | 0.695        | 0.809        | 0.722        | 0.046        |
| Sdha        | 480        | K        | 1.063        | 1.130        | 1.211    | 1.056    | 0.812        | 0.778        | 0.777        | 0.065        |
| <b>Sdha</b> | <b>547</b> | <b>K</b> | <b>1.144</b> | <b>1.259</b> | <b>-</b> | <b>-</b> | <b>0.851</b> | <b>0.726</b> | <b>0.656</b> | <b>0.045</b> |
| Sdha        | 608        | K        | -            | -            | 0.038    | 2.017    | 1.026        | 0.919        | 34.754       | -            |
| Sdha        | 633        | K        | 1.076        | 1.124        | 1.169    | 1.126    | 0.789        | 0.769        | 0.797        | 0.125        |
| Sdhb        | 235        | K        | 1.214        | 1.102        | 1.120    | 1.129    | 0.846        | 0.653        | 0.765        | 0.144        |
| Sdhb        | 263        | K        | 1.044        | -            | 1.030    | 1.056    | -            | -            | 1.018        | -            |
| Slc25a11    | 73         | K        | 1.016        | 0.816        | 0.981    | 0.900    | 1.275        | 1.009        | 1.132        | 0.393        |
| Slc25a3     | 94         | K        | 1.212        | 1.033        | 1.359    | 0.985    | 0.826        | 0.655        | 0.684        | 0.053        |
| Slc25a3     | 290        | K        | 1.101        | 1.196        | 1.129    | 1.086    | 0.806        | 0.740        | 0.768        | 0.080        |
| Slc25a4     | 33         | K        | 1.049        | 1.595        | 0.955    | 0.814    | 0.940        | 0.727        | 0.689        | 0.114        |
| Slc25a4     | 96         | K        | 1.094        | 1.176        | -        | 0.852    | -            | 0.886        | 0.766        | 0.023        |
| Slc25a4     | 147        | K        | 1.079        | 1.180        | 1.182    | 1.015    | 0.825        | 0.776        | 0.760        | 0.032        |
| Slc25a4     | 166        | K        | -            | 1.208        | -        | -        | 0.834        | -            | 0.690        | -            |
| Slc25a4     | 263        | K        | 1.050        | 1.230        | 1.167    | 0.955    | 0.812        | 0.850        | 0.759        | 0.015        |
| Slc25a5     | 147        | K        | 1.019        | -            | -        | 0.925    | -            | -            | 0.908        | -            |
| Sod2        | 68         | K        | 0.799        | 1.460        | -        | 0.449    | -            | 1.424        | 0.829        | 0.690        |
| Sod2        | 75         | K        | 1.069        | 0.962        | 0.982    | 1.068    | 0.944        | 1.027        | 1.009        | 0.872        |
| Sod2        | 114        | K        | 0.955        | 1.173        | 1.222    | 1.080    | 0.735        | 0.874        | 0.803        | 0.168        |
| Sucla2      | 78         | K        | 1.182        | 1.237        | -        | 1.107    | 0.787        | 0.734        | 0.724        | 0.132        |
| Sucla2      | 88         | K        | 0.989        | 1.250        | 1.224    | 0.999    | 0.960        | 0.648        | 0.753        | 0.132        |
| Sucla2      | 93         | K        | -            | -            | 1.083    | 1.206    | 0.781        | -            | 0.917        | -            |
| Sucla2      | 108        | K        | 1.047        | 1.104        | 1.208    | 1.186    | 0.818        | 0.711        | 0.808        | 0.212        |
| Sucla2      | 116        | K        | 1.072        | 1.152        | 1.285    | 1.072    | 0.826        | 0.668        | 0.731        | 0.088        |
| Sucla2      | 139        | K        | 0.848        | 0.958        | 1.367    | 1.531    | -            | 0.463        | 0.943        | 0.697        |
| Sucla2      | 143        | K        | 1.126        | 1.085        | 1.225    | 1.180    | 0.746        | 0.716        | 0.769        | 0.154        |
| Sucla2      | 216        | K        | 1.218        | 1.285        | 1.216    | 1.155    | 0.799        | 0.436        | 0.643        | 0.143        |
| Sucla2      | 287        | K        | 1.249        | -            | -        | -        | 0.700        | -            | 0.560        | -            |
| Suclg1      | 54         | K        | 0.973        | 1.059        | -        | 1.333    | -            | 0.683        | 0.992        | 0.871        |
| Suclg1      | 90         | K        | 1.018        | 1.257        | 1.534    | 1.046    | 0.649        | 0.584        | 0.598        | 0.068        |
| Suclg1      | 94         | K        | 0.900        | 1.056        | 1.136    | 1.059    | 0.971        | 0.912        | 0.951        | 0.594        |
| Suclg1      | 308        | K        | 0.970        | 1.261        | 1.158    | 1.048    | 0.833        | 0.787        | 0.787        | 0.108        |
| Suclg2      | 67         | K        | 1.419        | 0.644        | 0.804    | 1.387    | 1.062        | 0.683        | 1.092        | 0.755        |
| Tnni3       | 37         | K        | 1.251        | 0.922        | 0.974    | 1.030    | -            | 0.958        | 0.948        | 0.739        |
| Tnni3       | 121        | K        | 0.745        | 0.959        | 1.201    | 1.449    | 1.028        | 0.587        | 1.055        | 0.984        |
| Tnni3       | 165        | K        | -            | 1.172        | -        | 0.911    | -            | -            | 0.777        | -            |
| Tnni3       | 194        | K        | -            | 1.311        | -        | -        | 0.747        | -            | 0.570        | -            |
| Tnnt2       | 137        | K        | -            | -            | 1.231    | 0.820    | -            | -            | 0.666        | -            |
| Tnnt2       | 230        | K        | 1.424        | 0.992        | 1.078    | 0.913    | 0.860        | 0.806        | 0.738        | 0.064        |
| Tnnt2       | 266        | K        | 1.440        | 1.269        | 1.022    | -        | -            | 0.575        | 0.462        | -            |
| Tpm1        | 37         | K        | -            | 1.214        | -        | 1.227    | 0.550        | -            | 0.732        | -            |
| Tpm1        | 48         | K        | -            | -            | 0.974    | 1.047    | 0.852        | -            | 0.975        | -            |
| Tpm1        | 59         | K        | 1.129        | 1.055        | 1.335    | 1.067    | 0.833        | 0.669        | 0.730        | 0.097        |
| Tpm1        | 65         | K        | 0.984        | 1.056        | 1.091    | 1.280    | 0.711        | -            | 0.954        | 0.716        |

|               |           |          |              |              |              |              |              |              |              |              |
|---------------|-----------|----------|--------------|--------------|--------------|--------------|--------------|--------------|--------------|--------------|
| Tpm1          | 77        | K        | 0.381        | 1.212        | 1.673        | 1.149        | 0.742        | -            | 0.868        | 0.992        |
| Tpm1          | 112       | K        | 1.051        | 0.978        | 1.300        | 1.022        | 0.922        | 0.774        | 0.816        | 0.162        |
| Tpm1          | 118       | K        | -            | -            | 1.140        | 1.229        | 0.701        | 0.757        | 0.786        | -            |
| Tpm1          | 152       | K        | 0.989        | 1.187        | 1.100        | 1.091        | 0.778        | -            | 0.856        | 0.328        |
| Tpm1          | 168       | K        | 1.248        | 1.080        | -            | 1.066        | 0.897        | 0.673        | 0.755        | 0.201        |
| Tpm1          | 189       | K        | -            | 1.150        | -            | -            | 0.878        | -            | 0.763        | -            |
| Tpm1          | 205       | K        | 1.016        | 1.088        | 1.280        | 0.932        | 0.837        | -            | 0.784        | 0.090        |
| Tpm1          | 213       | K        | 0.980        | 1.166        | 1.158        | 0.974        | 0.980        | 0.790        | 0.831        | 0.108        |
| Tpm1          | 217       | K        | 1.026        | 1.159        | -            | 1.265        | 0.757        | 0.750        | 0.846        | 0.450        |
| Tpm1          | 220       | K        | 1.156        | 1.195        | 1.214        | 1.150        | 0.740        | 0.656        | 0.714        | 0.099        |
| Tpm3          | 214       | K        | 0.998        | 1.597        | 1.088        | 1.133        | 0.894        | 0.629        | 0.721        | 0.210        |
| Tpm3          | 221       | K        | 1.177        | 1.637        | 1.140        | 1.338        | 0.674        | 0.522        | 0.641        | 0.166        |
| Tpm3          | 252       | K        | 1.326        | 0.638        | 0.601        | 0.714        | 1.167        | 1.219        | 1.209        | 0.494        |
| Tpm4          | 184       | K        | 1.492        | 1.326        | 1.383        | 1.169        | 0.612        | 0.535        | 0.551        | 0.055        |
| Tpm4          | 190       | K        | 1.027        | 0.867        | 1.398        | 0.943        | 0.950        | 0.861        | 0.837        | 0.328        |
| Trap1         | 128       | K        | 0.807        | 0.759        | 0.852        | 1.280        | 1.157        | 1.159        | 1.487        | 0.001        |
| Tsfm          | 75        | K        | -            | 0.841        | -            | 1.308        | -            | -            | 1.555        | -            |
| Ttn           | 13401     | K        | 1.165        | 1.189        | 1.291        | 0.990        | 0.806        | 0.685        | 0.681        | 0.024        |
| Ttn           | 16660     | K        | 1.083        | 1.169        | 1.012        | 1.008        | 0.920        | 0.854        | 0.852        | 0.065        |
| Ttn           | 17332     | K        | 1.255        | 1.097        | -            | 1.033        | 0.692        | -            | 0.733        | 0.261        |
| Ttn           | 33769     | K        | 0.726        | -            | -            | 1.253        | -            | -            | 1.726        | -            |
| Tufm          | 91        | K        | 1.058        | 1.115        | 1.110        | 1.061        | 0.754        | -            | 0.829        | 0.217        |
| Uqcrb         | 12        | K        | 1.050        | 1.180        | 1.333        | 1.033        | 0.744        | 0.737        | 0.706        | 0.052        |
| <b>Uqerc2</b> | <b>92</b> | <b>K</b> | <b>1.471</b> | <b>1.135</b> | <b>1.154</b> | <b>0.952</b> | <b>0.668</b> | <b>0.719</b> | <b>0.622</b> | <b>0.025</b> |
| Uqerc2        | 375       | K        | -            | 1.438        | -            | 1.081        | -            | 0.535        | 0.562        | -            |
| Uqcrfs1       | 101       | K        | 1.227        | -            | 1.008        | 1.070        | -            | 0.656        | 0.772        | 0.395        |
| Uqcrh         | 40        | K        | -            | -            | 1.244        | 1.181        | 0.870        | 0.814        | 0.768        | -            |
| Vdac3         | 63        | K        | 1.141        | 0.958        | 0.980        | 0.962        | -            | -            | 0.937        | -            |
| $\alpha$ -MHC | 43        | K        | 0.821        | 1.233        | -            | 1.025        | 0.884        | 0.971        | 0.935        | 0.782        |
| $\alpha$ -MHC | 58        | K        | 1.234        | 1.251        | 1.077        | -            | 0.745        | 0.847        | 0.670        | 0.014        |
| $\alpha$ -MHC | 67        | K        | 1.084        | 1.221        | 1.297        | 1.072        | 0.781        | 0.656        | 0.697        | 0.068        |
| $\alpha$ -MHC | 72        | K        | 1.102        | 1.028        | 1.136        | 1.148        | 0.821        | 0.816        | 0.853        | 0.215        |
| $\alpha$ -MHC | 279       | K        | 1.138        | 1.200        | 1.123        | 0.934        | -            | 0.810        | 0.756        | 0.018        |
| $\alpha$ -MHC | 406       | K        | 0.886        | 1.306        | 1.008        | 1.101        | -            | 0.870        | 0.924        | 0.700        |
| $\alpha$ -MHC | 550       | K        | 1.214        | 1.268        | 1.018        | 0.797        | -            | -            | 0.683        | -            |
| $\alpha$ -MHC | 552       | K        | 1.214        | 1.268        | 1.018        | 0.797        | -            | -            | 0.683        | -            |
| $\alpha$ -MHC | 560       | K        | -            | 1.296        | -            | -            | 0.747        | -            | 0.576        | -            |
| $\alpha$ -MHC | 566       | K        | 1.111        | 1.191        | 1.203        | 1.006        | 0.762        | 0.819        | 0.738        | 0.023        |
| $\alpha$ -MHC | 642       | K        | 1.216        | 1.223        | 1.080        | 1.054        | 0.774        | 0.750        | 0.733        | 0.050        |
| $\alpha$ -MHC | 659       | K        | 1.180        | 1.178        | -            | -            | 0.939        | 0.734        | 0.709        | 0.104        |
| $\alpha$ -MHC | 665       | K        | 1.041        | -            | -            | -            | 1.140        | 0.675        | 0.872        | -            |
| $\alpha$ -MHC | 681       | K        | -            | 1.392        | -            | 0.703        | 0.760        | 1.055        | 0.603        | -            |
| $\alpha$ -MHC | 759       | K        | 1.155        | 1.142        | 1.001        | 0.948        | 0.898        | 0.905        | 0.834        | 0.021        |
| $\alpha$ -MHC | 855       | K        | -            | 0.961        | 1.133        | 1.103        | 0.886        | 0.857        | 0.906        | 0.456        |

|                                |             |          |              |              |              |              |              |              |              |              |
|--------------------------------|-------------|----------|--------------|--------------|--------------|--------------|--------------|--------------|--------------|--------------|
| $\alpha$ -MHC                  | 867         | K        | 0.993        | 1.188        | 1.144        | 1.026        | 0.838        | 0.870        | 0.822        | 0.076        |
| $\alpha$ -MHC                  | 912         | K        | 1.064        | 1.194        | 1.033        | 0.995        | 0.901        | 0.863        | 0.838        | 0.045        |
| $\alpha$ -MHC                  | 914         | K        | 1.180        | 1.388        | 0.932        | 1.033        | 0.845        | 0.717        | 0.741        | 0.131        |
| $\alpha$ -MHC                  | 941         | K        | 1.036        | 1.290        | 1.030        | 1.032        | 0.988        | 0.686        | 0.806        | 0.205        |
| $\alpha$ -MHC                  | 944         | K        | 0.973        | 0.942        | 0.792        | 0.899        | 0.950        | 1.382        | 1.194        | 0.339        |
| $\alpha$ -MHC                  | 953         | K        | 1.255        | 0.975        | 0.698        | 0.862        | 0.921        | 1.263        | 1.040        | 0.809        |
| $\alpha$ -MHC                  | 954         | K        | 1.299        | 0.974        | 0.964        | 0.999        | 0.859        | 0.942        | 0.865        | 0.270        |
| $\alpha$ -MHC                  | 1024        | K        | 0.962        | -            | -            | -            | 1.067        | 0.818        | 0.980        | -            |
| $\alpha$ -MHC                  | 1085        | K        | 1.046        | 1.196        | 1.154        | 1.124        | 0.777        | 0.780        | 0.789        | 0.124        |
| $\alpha$ -MHC                  | 1167        | K        | 0.950        | -            | -            | 1.072        | -            | -            | 1.128        | -            |
| $\alpha$ -MHC                  | 1175        | K        | 1.297        | 1.177        | 1.057        | 0.956        | 0.859        | 0.745        | 0.725        | 0.026        |
| $\alpha$ -MHC                  | 1197        | K        | 1.454        | 1.343        | 1.059        | 0.977        | 0.776        | 0.546        | 0.596        | 0.051        |
| $\alpha$ -MHC                  | 1244        | K        | -            | 1.471        | 0.877        | 0.977        | 0.760        | -            | 0.740        | 0.438        |
| <b><math>\alpha</math>-MHC</b> | <b>1249</b> | <b>K</b> | <b>1.258</b> | <b>1.345</b> | <b>1.094</b> | <b>0.966</b> | <b>0.824</b> | <b>0.639</b> | <b>0.657</b> | <b>0.033</b> |
| $\alpha$ -MHC                  | 1264        | K        | -            | -            | 0.912        | 1.106        | -            | -            | 1.213        | -            |
| $\alpha$ -MHC                  | 1281        | K        | 1.096        | 1.471        | 1.067        | 1.053        | 0.796        | 0.639        | 0.685        | 0.093        |
| $\alpha$ -MHC                  | 1307        | K        | 1.214        | 1.295        | 0.957        | 0.945        | 0.869        | 0.802        | 0.755        | 0.056        |
| $\alpha$ -MHC                  | 1318        | K        | 1.250        | 0.533        | 1.173        | 1.094        | 1.013        | -            | 1.069        | 0.732        |
| $\alpha$ -MHC                  | 1326        | K        | 0.976        | 1.204        | -            | -            | 0.912        | -            | 0.837        | -            |
| $\alpha$ -MHC                  | 1356        | K        | 1.227        | 0.660        | -            | 1.351        | -            | 0.792        | 1.136        | 0.766        |
| $\alpha$ -MHC                  | 1365        | K        | -            | 1.253        | 1.157        | 0.804        | 0.915        | 0.858        | 0.713        | 0.009        |
| $\alpha$ -MHC                  | 1376        | K        | 1.117        | 1.413        | 0.941        | 1.112        | 0.899        | 0.608        | 0.755        | 0.234        |
| $\alpha$ -MHC                  | 1392        | K        | 1.052        | 1.218        | 1.096        | 0.980        | -            | 0.845        | 0.813        | 0.078        |
| $\alpha$ -MHC                  | 1412        | K        | 0.834        | -            | -            | -            | 1.181        | 0.806        | 1.191        | -            |
| $\alpha$ -MHC                  | 1418        | K        | 1.111        | 1.260        | 0.966        | 0.905        | 0.945        | 0.866        | 0.814        | 0.068        |
| $\alpha$ -MHC                  | 1446        | K        | 1.498        | 1.260        | 0.327        | 1.146        | 0.945        | 0.844        | 0.951        | 0.802        |
| $\alpha$ -MHC                  | 1461        | K        | 0.892        | 1.759        | 0.890        | 1.114        | 0.867        | 0.594        | 0.727        | 0.366        |
| $\alpha$ -MHC                  | 1474        | K        | 1.370        | 1.261        | 1.056        | 1.025        | 0.814        | 0.597        | 0.661        | 0.068        |
| $\alpha$ -MHC                  | 1487        | K        | 0.715        | 1.312        | 0.786        | 1.098        | 1.145        | -            | 1.196        | 0.441        |
| $\alpha$ -MHC                  | 1530        | K        | 0.920        | 1.046        | 1.077        | 0.903        | 1.142        | 0.901        | 0.968        | 0.713        |
| <b><math>\alpha</math>-MHC</b> | <b>1533</b> | <b>K</b> | <b>1.357</b> | <b>1.357</b> | <b>-</b>     | <b>0.912</b> | <b>0.782</b> | <b>0.639</b> | <b>0.573</b> | <b>0.024</b> |
| $\alpha$ -MHC                  | 1571        | K        | 1.494        | 0.824        | 0.941        | 1.004        | 1.051        | 0.714        | 0.850        | 0.546        |
| $\alpha$ -MHC                  | 1577        | K        | 0.975        | -            | 1.024        | 1.052        | 0.977        | 0.860        | 0.963        | 0.641        |
| $\alpha$ -MHC                  | 1581        | K        | 1.175        | 1.182        | 1.003        | 1.133        | 0.782        | 0.796        | 0.807        | 0.161        |
| $\alpha$ -MHC                  | 1643        | K        | -            | 1.240        | 1.109        | 1.032        | 0.835        | 0.772        | 0.749        | 0.090        |
| $\alpha$ -MHC                  | 1702        | K        | 1.279        | 1.211        | 1.088        | 0.941        | 0.809        | 0.773        | 0.705        | 0.010        |
| $\alpha$ -MHC                  | 1729        | K        | 0.864        | 1.706        | 1.477        | 0.731        | 0.561        | 0.859        | 0.532        | 0.066        |
| $\alpha$ -MHC                  | 1759        | K        | 1.240        | 1.232        | 1.086        | 0.781        | 0.919        | 0.828        | 0.711        | 0.006        |
| $\alpha$ -MHC                  | 1773        | K        | 1.370        | 1.296        | -            | 1.083        | -            | 0.419        | 0.563        | 0.288        |
| $\alpha$ -MHC                  | 1793        | K        | 1.074        | 1.133        | 0.993        | 0.962        | -            | 0.998        | 0.919        | 0.202        |
| $\alpha$ -MHC                  | 1833        | K        | 1.063        | 1.102        | 1.193        | 1.315        | 0.622        | 0.789        | 0.812        | 0.313        |
| $\alpha$ -MHC                  | 1840        | K        | 1.054        | -            | 1.047        | 1.023        | -            | -            | 0.974        | -            |
| $\alpha$ -MHC                  | 1850        | K        | 0.712        | 1.380        | 0.920        | 1.147        | 1.004        | 0.848        | 0.996        | 0.909        |
| $\alpha$ -MHC                  | 1860        | K        | 1.197        | 1.297        | 0.998        | 1.035        | 0.879        | 0.682        | 0.743        | 0.102        |

|                                |             |          |              |              |          |              |              |              |              |              |
|--------------------------------|-------------|----------|--------------|--------------|----------|--------------|--------------|--------------|--------------|--------------|
| $\alpha$ -MHC                  | 1872        | K        | 1.076        | 1.128        | 1.051    | 1.003        | -            | -            | 0.924        | -            |
| <b><math>\alpha</math>-MHC</b> | <b>1897</b> | <b>K</b> | <b>1.695</b> | <b>1.141</b> | <b>-</b> | <b>0.600</b> | <b>0.810</b> | <b>0.802</b> | <b>0.520</b> | <b>0.045</b> |
| $\alpha$ -MHC                  | 1900        | K        | 1.141        | 1.162        | 1.198    | 1.159        | 0.768        | 0.669        | 0.742        | 0.120        |
| $\alpha$ -MHC                  | 1921        | K        | 1.099        | 1.194        | 1.133    | 0.959        | 0.809        | 0.880        | 0.773        | 0.009        |

Of all 483 overlapping lactylated modified sites, 14 lactylated modified sites (marked in red) were significantly differentially expressed between the control group and the Ang II-induced heart failure group using cut offs of fold change  $> 1.5$ / fold change  $< 0.67$ , and  $P$  value  $< 0.05$ .
