# Supplementary material for: α-myosin heavy chain lactylation maintains sarcomeric structure and function and alleviates the development of heart failure
Source: PubMed Central journal article supplement (PMC10474270; doi:10.1038/s41422-023-00844-w), 2023-07-13
Supplement: 41422_2023_844_MOESM11_ESM.pdf [file 41422_2023_844_MOESM11_ESM.pdf]

**Supplementary information, Table S3 Plasmids and siRNA used in this study**

| <b>PLASMID</b>                         | <b>SPECIES</b> | <b>TAG</b>             | <b>VECTOR</b> | <b>IDENTIFIER</b> | <b>SOURCE</b>                   |
|----------------------------------------|----------------|------------------------|---------------|-------------------|---------------------------------|
| $\alpha$ -MHC WT                       | Human          | 1XMyC                  | GV172         | GOSE0270372       | GeneChem (China)                |
| $\alpha$ -MHC K1897R                   | Human          | 1XMyC                  | GV172         | GOSE0270369       | GeneChem (China)                |
| $\alpha$ -MHC $\Delta$ TMPIT           | Human          | 1XMyC                  | GV172         | GOSE0324668       | GeneChem (China)                |
| $\alpha$ -MHC $\Delta$ Class II domain | Human          | 1XMyC                  | GV172         | GOSE0324663       | GeneChem (China)                |
| $\alpha$ -MHC $\Delta$ SH3             | Human          | 1XMyC                  | GV172         | GOSE0324662       | GeneChem (China)                |
| $\alpha$ -MHC $\Delta$ SPEC            | Human          | 1XMyC                  | GV172         | GOSE0324664       | GeneChem (China)                |
| $\alpha$ -MHC $\Delta$ mmCoA           | Human          | 1XMyC                  | GV172         | GOSE0324665       | GeneChem (China)                |
| $\alpha$ -MHC $\Delta$ MIT-CorA        | Human          | 1XMyC                  | GV172         | GOSE0324666       | GeneChem (China)                |
| LDHA                                   | Human          | 1XMyC                  | GV172         | GOSE0338080       | GeneChem (China)                |
| Titin A80-82                           | Human          | 6XHis                  | GV172         | GOSE0301069       | GeneChem (China)                |
| Titin I1065-1108                       | Human          | 6XHis                  | GV172         | GOSE0301072       | GeneChem (China)                |
| Titin A84-86                           | Human          | 6XHis                  | GV172         | GOSE0301071       | GeneChem (China)                |
| Titin A77-78                           | Human          | 6XHis                  | GV172         | GOSE0301036       | GeneChem (China)                |
| SIRT1                                  | Human          | 1XFlag                 | Pcdna3.1      |                   |                                 |
| SIRT2                                  | Human          | 1XFlag                 | Pcdna3.1      |                   |                                 |
| SIRT3                                  | Human          | 1XFlag                 | Pcdna3.1      |                   | A gift from Prof.Chuangui Wang  |
| SIRT4                                  | Human          | 1XFlag                 | Pcdna3.1      |                   | (China Medical University,      |
| SIRT5                                  | Human          | 1XFlag                 | Pcdna3.1      |                   | Shenyang, China)                |
| SIRT6                                  | Human          | 1XFlag                 | Pcdna3.1      |                   |                                 |
| SIRT7                                  | Human          | 1XFlag                 | Pcdna3.1      |                   |                                 |
| GCN5                                   | Human          | 1XMyC                  |               |                   | A gift from Prof.Qunying Lei    |
| P300                                   | Human          | 1XFlag                 |               |                   | (Shanghai Medical College,      |
| CBP                                    | Human          | 1XFlag                 |               |                   | Shanghai, China)                |
| PCAF                                   | Human          | 1XFlag                 |               |                   | A gift from Prof. Weiguo Zhu    |
|                                        |                |                        |               |                   | (Shenzhen University, Shenzhen, |
|                                        |                |                        |               |                   | China)                          |
| <b>siRNA</b>                           | <b>SPECIES</b> | <b>TARGET SEQUENCE</b> |               | <b>SOURCE</b>     |                                 |
| siLDHA 001                             | Human          | GAGGTAGCTTGGAACCTAA    |               | RIBOBIO (China)   |                                 |
| siLDHA 002                             | Human          | GCCACTATGTGGTAGTTAA    |               | RIBOBIO (China)   |                                 |
| siLDHA 003                             | Human          | GACAGAGCCTCAGATTACA    |               | RIBOBIO (China)   |                                 |
