# Supplementary material for: α-myosin heavy chain lactylation maintains sarcomeric structure and function and alleviates the development of heart failure
Source: PubMed Central journal article supplement (PMC10474270; doi:10.1038/s41422-023-00844-w), 2023-07-13
Supplement: 41422_2023_844_MOESM12_ESM.pdf [file 41422_2023_844_MOESM12_ESM.pdf]

**Supplementary information, Table S4 Antibodies and reagents used in this study**

| <b>ANTIBODY</b>                                 | <b>IDENTIFIER</b> | <b>SOURCE</b>                   |
|-------------------------------------------------|-------------------|---------------------------------|
| Anti- $\alpha$ -MHC                             | Cat#sc-32732      | Santa (USA)                     |
| Anti-LDHA                                       | Cat#19987-1-AP    | Proteintech(China)              |
| Anti-Tubulin                                    | Cat#11224-1-AP    | Proteintech (China)             |
| Anti- $\alpha$ -MHC K1897 Lactyl Lysine         | Cat#CL030202      | PTMBIO(China)                   |
| Anti-Pan Kla                                    | Cat#PTM-1401RM    | PTMBIO(China)                   |
| Anti-Cleaved-PARP1                              | Cat#5625S         | Cell Signaling Technology (USA) |
| Anti-Cleaved-Caspase3                           | Cat#19677-1-AP    | Proteintech (China)             |
| Anti-Flag                                       | Cat#GNI4110-FG-M  | GNI (Japan)                     |
| Anti-Myc                                        | Cat#GNI4110-MC-M  | GNI (Japan)                     |
| Anti-His                                        | Cat#GNI4110-HS-M  | GNI (Japan)                     |
| Anti-P300                                       | Cat#70088         | Cell Signaling Technology (USA) |
| Anti-P300                                       | Cat#AF5360        | Affinity Biosciences (China)    |
| Anti-BNP                                        | Cat#DF6902        | Affinity Biosciences (China)    |
| Anti-SIRT1                                      | Cat#8469          | Cell Signaling Technology (USA) |
| Anti-SIRT1                                      | Cat#13161-1-AP    | Proteintech (China)             |
| Anti- $\alpha$ -SMA                             | Cat#55135-1-AP    | Proteintech(China)              |
| Anti-Col-1                                      | Cat#67288-1-Ig    | Proteintech (China)             |
| Anti-Titin                                      | Cat#sc-271946     | Santa (USA)                     |
| Normal rabbit IgG                               | Cat#A7016         | Beyotime Biotechnology (China)  |
| Normal mouse IgG                                | Cat#A7028         | Beyotime Biotechnology (China)  |
| <b>REAGENT</b>                                  |                   |                                 |
| Masson's Trichrome Stain Kit                    | Cat#G1340         | Solarbio (China)                |
| Eosin Y solution                                | Cat#G1100         | Solarbio (China)                |
| Mayer Hematoxylin solution                      | Cat#G1080         | Solarbio (China)                |
| WGA,Fluorescein                                 | Cat#FL-1021       | Vector laboratories (USA)       |
| Galloflavin (LDHA inhibitor)                    | Cat#HY-W040118    | MedChemExpress (USA)            |
| C646(P300 inhibitor)                            | Cat#HY-13823      | MedChemExpress (USA)            |
| CTB (P300 activator)                            | Cat#HY-134964     | MedChemExpress (USA)            |
| EX527 (SIRT1 inhibitor)                         | Cat#A4181         | APExBio (USA)                   |
| SRT1720 (SIRT1 activator)                       | Cat#A4180         | APExBio (USA)                   |
| Lactate sodium                                  | Cat#HY-B2227B     | MedChemExpress (USA)            |
| VB124                                           | Cat#S9929         | Selleck (USA)                   |
| CheKine™ Lactate Assay Kit                      | Cat#KTB1100       | Abbkine (China)                 |
| Fetal Bovine Serum                              | Cat#FB15015       | Clark (Australia)               |
| High-glucose DMEM                               | Cat#01-052-1A     | Biological Industries (Israel)  |
| Lipofectamine 3000                              | Cat#L3000015      | Invitrogen (USA)                |
| HiGene                                          | Cat#c1506         | Applygen (China)                |
| PageRuler™ Prestained Protein Ladder            | Cat#26616         | Thermo Scientific (USA)         |
| PageRuler™ Multicolor High Range Protein Ladder | Cat#26625         | Thermo Scientific (USA)         |
| jetPRIME                                        | Cat#PT-114-15     | Polyplus (France)               |
| Ang II                                          | Cat#HY-13948      | MedChemExpress (USA)            |

|                                                      |              |                                    |
|------------------------------------------------------|--------------|------------------------------------|
| AIZET Osmotic Pumps                                  | Cat#2002     | DURECT Corporation (Cupertino, CA) |
| Protein A/G magnetic beads                           | Cat#B23202   | Bimake(USA)                        |
| Tris-EDTA Antigen Retrieval<br>Solution, 10×(ph=9.0) | Cat#C1038    | Solarbio (China)                   |
| DAB plus                                             | Cat#DAB-2031 | MXB Biotechnologies (China)        |
| UltraSensitive™ SP(Mouse/Rabbit)<br>IHC Kit          | Cat#KIT-9710 | MXB Biotechnologies (China)        |

---
